# Supplementary material for: Development and investigation of efficient resonance ionization mass spectrometry schemes of gadolinium
Source: Royal Society of Chemistry journal article supplement (doi:10.1039/d5ja00325c), 2025-01-01
Supplement: d5ja00325c1.xlsx [file d5ja00325c1.xlsx]

## Sheet: fig2
	2 color referemnce First excited state scan
	Wavelength( nm)	Shift (GHz)	Gd-152	σ Gd-152	Gd-154	σ Gd-154	Gd-155	σ Gd-155	Gd-156	σ Gd-156	Gd-157	σ Gd-157	Gd-158	σ Gd-158	Gd-160	σ Gd-160
	432.818	26.3804	NaN	NaN	0.11111	0.04781	0.05035	0.00975	0.07572	0.01257	0.03668	0.00779	0.07999	0.01226	0.05719	0.01092
	432.82	22.9982	1	1.41421	0.10714	0.04602	0.03386	0.0079	0.07276	0.01354	0.01886	0.00574	0.03018	0.00766	0.04276	0.00953
	432.821	21.3071	1.2	0.72663	0.10555	0.02546	0.06056	0.00572	0.06604	0.0065	0.04354	0.00466	0.05172	0.00536	0.04921	0.00553
	432.822	19.616	2.24999	1.35207	0.32075	0.0894	0.10627	0.01282	0.10731	0.01423	0.04892	0.00802	0.06038	0.00948	0.05328	0.00938
	432.823	17.925	3.33334	2.19427	0.29166	0.08859	0.14944	0.01748	0.11998	0.01682	0.08476	0.01261	0.10452	0.01509	0.05579	0.01124
	432.825	16.2339	2.33333	1.61015	0.1129	0.04502	0.03691	0.00784	0.04737	0.00916	0.03256	0.00675	0.0468	0.00833	0.04261	0.00853
	432.825	15.5575	13.0001	13.4908	0.60465	0.10621	0.26992	0.01795	0.2172	0.01699	0.13277	0.01142	0.12893	0.01183	0.07938	0.00993
	432.826	14.5428	2.00001	1.73205	0.74999	0.13893	0.35354	0.02436	0.2973	0.02457	0.20357	0.01718	0.20318	0.01808	0.08531	0.01177
	432.827	12.8518	3.71054	0.67821	0.92381	0.03775	0.55717	0.00795	0.4671	0.00784	0.32217	0.0054	0.26405	0.00509	0.13711	0.00367
	432.828	11.1607	2	1.22474	0.69791	0.1111	0.69152	0.03724	0.56096	0.03504	0.40675	0.02468	0.31626	0.02149	0.1834	0.01792
	432.829	9.46967	1.8	1.00399	0.82607	0.12805	0.95256	0.04378	0.84978	0.0455	0.69808	0.03297	0.52415	0.02966	0.3341	0.02344
	432.83	7.77864	3.00001	2.44949	1.11594	0.18499	0.89097	0.04467	0.95119	0.05318	0.86049	0.0426	0.81653	0.04489	0.54425	0.03646
	432.831	6.08762	0.4	0.23664	0.67668	0.09236	0.85891	0.03661	0.92887	0.04393	0.87213	0.03578	0.88888	0.0391	0.6517	0.032
	432.832	4.3966	NaN	NaN	0.92308	0.21334	1.17709	0.07994	1.01908	0.07487	1.08725	0.06948	0.94393	0.06414	1.01584	0.0735
	432.833	2.16447	0.6	0.43818	0.97702	0.149	0.98153	0.04347	0.94841	0.04654	0.99999	0.04254	1.10742	0.04932	1.05472	0.05022
	432.834	1.69099	0.66667	0.60858	0.98989	0.14105	0.96654	0.03889	1.04416	0.04576	1.04181	0.0402	1.05152	0.04232	1.03024	0.04446
	432.834	0.3382	0.8	0.53665	0.91406	0.11691	0.7971	0.03256	0.99312	0.04123	0.94504	0.03529	1.03513	0.04011	1.04697	0.04316
	432.834	1.0146	1	0.81649	1	0.17025	0.85992	0.04394	0.98547	0.05336	0.92803	0.04319	0.87031	0.0436	1.08964	0.05736
	432.835	0	0.42857	0.29574	0.58955	0.08362	0.7147	0.02916	0.89097	0.03702	0.83891	0.03044	0.89496	0.03325	0.96069	0.03773
	432.836	-1.69099	0.5	0.61237	0.48386	0.06806	0.54272	0.0234	0.77114	0.03216	0.6983	0.02617	0.91562	0.0325	1.00711	0.03794
	432.835	-0.6764	0		0.54544	0.11301	0.58996	0.0351	0.83947	0.04978	0.8573	0.04565	0.97104	0.05266	0.92586	0.05303
	432.836	-2.36738	0.25	0.27951	0.20353	0.04656	0.48197	0.02706	0.74442	0.03892	0.7181	0.03398	1.01478	0.04641	1.04759	0.0505
	432.837	-3.04377	0.66667	0.60858	0.26055	0.04809	0.342	0.0194	0.62067	0.03135	0.52681	0.02503	0.84079	0.03582	1.05576	0.04605
	432.837	-4.05835	NaN	NaN	0.20618	0.05063	0.23638	0.01729	0.46081	0.02868	0.40525	0.02287	0.82193	0.03995	0.96905	0.04859
	432.838	-4.73474	Nan	NaN	0.12195	0.04085	0.20709	0.01597	0.37404	0.02482	0.33228	0.02086	0.67716	0.03461	0.85392	0.04336
	432.838	-5.74932	0.25	0.27951	0.14666	0.04735	0.10618	0.01184	0.24957	0.02234	0.1781	0.01578	0.41304	0.02711	0.71343	0.04164
	432.839	-6.76389	0.5	0.61237	0.07407	0.03838	0.07196	0.01087	0.18108	0.02052	0.13923	0.01533	0.32451	0.02661	0.54997	0.03973
	432.839	-7.44028	0.4023	0.08053	0.10882	0.00678	0.0855	0.0018	0.17409	0.0029	0.13002	0.00215	0.29925	0.00366	0.53738	0.00575
	432.84	-8.11666	0	NaN	0.04629	0.02118	0.04501	0.00604	0.07733	0.00881	0.05186	0.00623	0.13502	0.01116	0.23513	0.0164
	432.84	-9.13123	0.33333	0.3849	0.06863	0.02681	0.06552	0.00766	0.09426	0.00991	0.08274	0.00817	0.18854	0.0137	0.32377	0.02017
	432.841	-10.8222	0	NaN	0.04081	0.02082	0.03878	0.00617	0.08906	0.01039	0.05318	0.00682	0.13297	0.01209	0.22	0.01758
	432.844	-14.204	0	NaN	0.0693	0.02709	0.01982	0.00447	0.04888	0.00772	0.02726	0.00522	0.06821	0.00843	0.09516	0.01106
	432.846	-17.5859	1	1	0.02564	0.01499	0.01732	0.00381	0.02877	0.00551	0.02141	0.00402	0.04508	0.00639	0.04736	0.00715
	432.848	-20.9676	0	NaN	0.00926	0.0093	0.02141	0.00433	0.02999	0.00586	0.02214	0.00431	0.03876	0.00602	0.04243	0.00677
	1 Color wavelength scan
	Wavelength( nm)	Shift (GHz)	Gd-154	σ Gd-154	Gd-155	σ Gd-155	Gd-156	σ Gd-156	Gd-157	σ Gd-157	Gd-158	σ Gd-158	Gd-160	σ Gd-160
	405.824	220.344	0.01121	0.00269	0.01065	0.00106	0.01017	0.000884561	0.00836	0.000916914	0.01014	0.000849772	0.01005	0.000906329
	405.822	223.987	0.01076	0.00277	0.01122	0.0011	0.01006	0.000918337	0.00934	0.000983113	0.01217	0.000990561	0.01151	0.00104
	405.82	227.631	0.01033	0.00274	0.00782	0.000991005	0.01098	0.00102	0.00795	0.000976055	0.01178	0.00102	0.01121	0.00107
	405.796	271.352	0.00724	0.0021	0.00976	0.00103	0.00928	0.00087619	0.00788	0.0008847	0.00969	0.000850669	0.01077	0.000982983
	405.799	265.886	0.00927	0.00261	0.01044	0.00114	0.01145	0.00105	0.01217	0.0012	0.01018	0.000926498	0.01069	0.00102
	405.804	256.777	0.00634	0.00208	0.01096	0.00116	0.00996	0.00095271	0.00939	0.00105	0.01056	0.000937223	0.0113	0.00104
	405.81	245.847	0.00922	0.0026	0.0073	0.000975121	0.00797	0.000881602	0.0096	0.00113	0.01132	0.00102	0.0109	0.00107
	405.815	236.739	0.00903	0.00239	0.00944	0.00101	0.00847	0.000833212	0.00801	0.00091013	0.01069	0.00088771	0.00881	0.00086538
	405.825	218.523	0.02055	0.00437	0.01129	0.00129	0.01302	0.00119	0.01127	0.00123	0.01364	0.00115	0.01247	0.00116
	405.83	209.415	0.02248	0.00445	0.01177	0.00124	0.01452	0.00123	0.01173	0.00121	0.01459	0.00116	0.01691	0.00136
	405.835	200.308	0.01495	0.00275	0.01822	0.00133	0.01921	0.0012	0.02006	0.00138	0.02289	0.00129	0.02322	0.0014
	405.832	204.861	0.01026	0.00251	0.01437	0.00131	0.01444	0.00113	0.01373	0.00123	0.01484	0.00111	0.01558	0.00122
	405.93	6	0.72317	0.04439	0.78927	0.01959	0.83439	0.01764	0.79013	0.01907	0.87425	0.0171	0.81677	0.01688
	405.93	6	0.73252	0.07064	0.89209	0.03311	0.93801	0.02979	0.85979	0.03161	0.95392	0.02841	0.87153	0.02768
	405.94	-12.2057	0.45908	0.07793	0.68859	0.04021	0.59735	0.03239	0.53747	0.03426	0.63758	0.03167	0.54045	0.02972
	405.925	15.1032	0.39286	0.03527	0.41146	0.01501	0.40897	0.01296	0.41684	0.01473	0.43322	0.01259	0.43421	0.01295
	405.93		1	0.04742	0.92466	0.01935	0.9326	0.01699	0.914	0.01873	0.97643	0.01651	0.92289	0.0164
	405.92	24.2066	0.31833	0.02516	0.31469	0.01035	0.31117	0.00889	0.28883	0.00963	0.28129	0.00795	0.24962	0.00767
	405.915	33.3103	0.28839	0.02685	0.28293	0.01098	0.24384	0.0088	0.24263	0.00985	0.24036	0.00822	0.18951	0.00747
	405.91	42.4142	0.2028	0.0223	0.18307	0.00871	0.16226	0.00706	0.15706	0.00782	0.15044	0.00639	0.12445	0.00597
	405.905	51.5183	0.17017	0.0257	0.10409	0.00823	0.0959	0.0068	0.0871	0.0073	0.09233	0.00632	0.08101	0.00603
	405.9	60.6226	0.09135	0.02536	0.08288	0.01002	0.09488	0.00911	0.08462	0.00969	0.09791	0.00876	0.07479	0.00805
	405.923	19.6549	0.3132	0.03782	0.32427	0.01592	0.32541	0.0138	0.29604	0.01475	0.32999	0.01308	0.26289	0.01196
	405.945	-21.3083	0.38718	0.06388	0.53371	0.03136	0.47143	0.02548	0.51881	0.03003	0.51318	0.02513	0.44435	0.02389
	405.96	-48.6145	0.19885	0.03522	0.18376	0.01392	0.14951	0.0108	0.16911	0.01295	0.1819	0.01122	0.19203	0.01191
	405.965	-57.7161	0.13066	0.02122	0.19137	0.01057	0.20725	0.0095	0.19629	0.01039	0.2106	0.009	0.20387	0.00911
	405.97	-66.8176	0.09746	0.01017	0.10208	0.00426	0.11639	0.00393	0.10852	0.00427	0.12027	0.00375	0.12077	0.00387
	405.933		0.82285	0.03571	0.84851	0.01535	0.82811	0.01323	0.82912	0.01477	0.90773	0.01317	0.80797	0.01265
	405.938	-7.65439	0.68819	0.05297	0.77027	0.02366	0.76826	0.0206	0.71066	0.02207	0.73561	0.01901	0.67671	0.01863
	405.942	-16.757	0.44638	0.03064	0.50493	0.0136	0.47041	0.01137	0.49819	0.01312	0.51536	0.01125	0.47514	0.01107
	405.918	28.7584	0.30554	0.04023	0.30281	0.01655	0.29423	0.0141	0.27189	0.01525	0.29818	0.01336	0.24902	0.0125
	405.928	10.5516	0.56015	0.03262	0.57839	0.01388	0.58685	0.01215	0.57156	0.01341	0.62507	0.01186	0.60722	0.012
	405.929	7.82062	0.6079	0.03821	0.72595	0.0176	0.77431	0.01589	0.74136	0.01735	0.83455	0.01567	0.76846	0.01534
	405.932	3.26908	0.86349	0.07464	1	0.03429	1	0.02999	1	0.03334	1	0.02838	1	0.02908
	405.921	23.2963	0.3473	0.01312	0.31004	0.00513	0.28856	0.00434	0.29603	0.00494	0.26067	0.00379	0.2448	0.00388
	405.925	16.0135	0.44983	0.02086	0.37248	0.00793	0.35541	0.00683	0.36577	0.00777	0.32984	0.00607	0.33982	0.00656
	405.93	6.91031	0.76038	0.02904	0.69507	0.01227	0.70003	0.01112	0.72766	0.01252	0.70166	0.01049	0.69849	0.01097
	405.955	-39.5127	0.17941	0.01291	0.17448	0.00513	0.17651	0.00451	0.19088	0.00533	0.2171	0.00469	0.25459	0.00547
	405.96	-48.6145	0.12445	0.009	0.12514	0.0036	0.12327	0.00311	0.1249	0.00356	0.13341	0.00299	0.14525	0.00335
	405.975	-75.9188	0.07467	0.00675	0.0894	0.00293	0.09244	0.00259	0.09217	0.00294	0.09713	0.00244	0.10043	0.00266
	405.99	-103.221	0.0392	0.00516	0.03548	0.00192	0.03314	0.0016	0.03651	0.00192	0.03467	0.0015	0.03641	0.00165
	405.995	-112.321	0.06984	0.00566	0.06365	0.00213	0.06501	0.00186	0.06823	0.00218	0.06515	0.00171	0.06818	0.00188
	405.983	-89.5701	0.09585	0.01056	0.08599	0.00395	0.08939	0.0035	0.09072	0.00402	0.08926	0.00321	0.09146	0.00349
	405.966	-60.4466	0.16511	0.01077	0.16576	0.00434	0.17561	0.00392	0.18954	0.00462	0.1841	0.00371	0.19776	0.00412
	405.971	-68.6378	0.119	0.00806	0.11003	0.00308	0.11297	0.00272	0.12354	0.00324	0.11851	0.00256	0.13027	0.00289
	405.969	-64.9973	0.10885	0.00934	0.11702	0.00386	0.12979	0.00355	0.12298	0.00392	0.12795	0.00324	0.14045	0.00365
	405.962	-53.1654	0.14975	0.00858	0.13982	0.00332	0.13643	0.00285	0.14119	0.0033	0.13185	0.00258	0.13984	0.00285
	405.95	-30.4106	0.31174	0.01361	0.3272	0.0058	0.3391	0.00523	0.35357	0.006	0.35361	0.00499	0.38274	0.00555
	405.952	-34.9616	0.22482	0.01257	0.22177	0.00508	0.22059	0.00444	0.23907	0.00524	0.24187	0.00433	0.28154	0.00504
	405.952	-33.1412	0.24834	0.01207	0.24209	0.00487	0.26106	0.00447	0.26723	0.00509	0.26629	0.00419	0.30148	0.00479
	405.95	-29.5004	0.30545	0.01533	0.30487	0.00633	0.32178	0.00577	0.32849	0.00654	0.33437	0.00549	0.35853	0.00607
	405.948	-26.7697	0.39671	0.01518	0.39723	0.00639	0.41958	0.00587	0.41641	0.00651	0.41917	0.00547	0.4535	0.00608
	405.946	-23.1288	0.34552	0.01397	0.32496	0.00562	0.33235	0.00504	0.34282	0.00574	0.33274	0.00468	0.34938	0.00511
	405.945	-20.398	0.48999	0.01874	0.45486	0.00767	0.45791	0.00686	0.47798	0.00783	0.45605	0.00639	0.4645	0.00683
	405.945	-22.2185	0.49141	0.01905	0.48508	0.00809	0.48905	0.00726	0.49388	0.0081	0.48516	0.00676	0.4897	0.00717
	405.94	-12.2057	0.58991	0.01735	0.51838	0.00698	0.5006	0.0061	0.50695	0.00682	0.468	0.00547	0.45898	0.0057
	405.942	-15.8468	0.63544	0.02667	0.54099	0.01059	0.55214	0.0096	0.53119	0.01037	0.51578	0.00861	0.50004	0.0089
	405.943	-17.6673	0.61911	0.02371	0.60167	0.01019	0.58208	0.00895	0.60537	0.01014	0.55936	0.00819	0.54462	0.00847
	405.938	-8.56466	0.73857	0.01642	0.63752	0.00667	0.62828	0.00594	0.63732	0.00661	0.5922	0.00537	0.58127	0.00558
	405.936		0.74744	0.01533	0.6721	0.0064	0.65279	0.00565	0.65541	0.00624	0.61338	0.0051	0.61679	0.00538
	405.934	-1.2824	0.97308	0.01946	0.83417	0.00811	0.8348	0.00736	0.84444	0.00811	0.79392	0.00672	0.80262	0.00709
	405.933	1.44848	0.93865	0.02474	0.86964	0.01081	0.89308	0.01	0.91253	0.01107	0.86419	0.00925	0.8802	0.00979
	405.93		1	0.02373	1	0.011	1	0.01004	1	0.01091	1	0.00954	1	0.00994
	405.929	7.82062	0.81357	0.01553	0.73684	0.00657	0.75827	0.00605	0.76821	0.00669	0.73427	0.00558	0.75248	0.00595
	405.926	13.2826	0.51953	0.01287	0.50179	0.00542	0.50731	0.00488	0.51326	0.00544	0.49375	0.00448	0.49974	0.00477
	405.924	16.9239	0.52144	0.01705	0.44508	0.00667	0.42814	0.0058	0.43674	0.00653	0.40102	0.00519	0.38788	0.00538
	405.922	20.5652	0.39073	0.0148	0.342	0.00576	0.32593	0.00495	0.33326	0.00561	0.30597	0.00443	0.2773	0.00443
	405.919	26.0273	0.33553	0.0126	0.33316	0.00522	0.31603	0.00448	0.32514	0.0051	0.28599	0.00391	0.26818	0.004
	405.912	38.7726	0.24072	0.01303	0.19528	0.00474	0.1867	0.00405	0.1959	0.0047	0.17771	0.00363	0.16182	0.00368
	405.91	42.4142	0.16823	0.01071	0.17782	0.00444	0.165	0.00373	0.16626	0.00424	0.15419	0.00331	0.14297	0.00339
	405.908	46.0558	0.13273	0.00826	0.13278	0.0033	0.12537	0.00279	0.12938	0.00322	0.12106	0.00251	0.11595	0.00263
	405.905	51.5183	0.15034	0.00938	0.16169	0.00391	0.15092	0.00329	0.14414	0.00364	0.15079	0.00303	0.14333	0.00315
	405.9	60.6226	0.09172	0.00675	0.09422	0.00271	0.09151	0.00232	0.09349	0.00267	0.0909	0.00212	0.08306	0.00217
	405.824	199.036	0.01125	0.00252	0.01089	0.00104	0.01051	0.000880453	0.00842	0.000904026	0.00993	0.000810049	0.0099	0.000873509
	405.822	202.679	0.01045	0.00254	0.01233	0.00116	0.01036	0.00091392	0.01005	0.00103	0.01158	0.000914473	0.01082	0.000954829
	405.82	206.322	0.01114	0.00279	0.00808	0.000996167	0.01127	0.00101	0.00826	0.000996066	0.01148	0.000968779	0.01083	0.00102
	405.796	250.043	0.00771	0.00214	0.01023	0.00103	0.0093	0.000850158	0.00847	0.000930963	0.0095	0.000813419	0.0102	0.000910228
	405.799	244.578	0.00944	0.00252	0.01079	0.00113	0.01118	0.000994117	0.01264	0.00121	0.01001	0.000889968	0.01058	0.000988135
	405.804	235.469	0.0066	0.00209	0.01127	0.00115	0.01009	0.000934311	0.00954	0.00104	0.01034	0.00089538	0.01117	0.00101
	405.81	224.539	0.01021	0.00273	0.00757	0.000986708	0.00819	0.000884678	0.00941	0.00109	0.01109	0.000974504	0.01085	0.00104
	405.815	215.43	0.00941	0.00235	0.00972	0.001	0.00845	0.000806479	0.00819	0.00091133	0.01058	0.000854808	0.00866	0.00083486
	405.825	197.214	0.02061	0.00397	0.01101	0.00122	0.01296	0.00114	0.01156	0.00123	0.0133	0.00109	0.01271	0.00115
	405.83	188.107	0.02319	0.0041	0.01249	0.00126	0.01448	0.00117	0.01234	0.00124	0.01432	0.0011	0.01622	0.00127
	405.835	178.999	0.0191	0.00314	0.02026	0.00136	0.02029	0.00117	0.02105	0.00137	0.02161	0.00115	0.02156	0.00124
	405.832	183.553	0.01204	0.00276	0.01494	0.00129	0.01481	0.00111	0.0145	0.00126	0.01422	0.00103	0.01504	0.00114
	405.837	174.446	0.01813	0.0037	0.02339	0.00177	0.02545	0.00159	0.02651	0.00186	0.02605	0.00152	0.02577	0.00164
	405.842	165.338	0.01366	0.00298	0.01739	0.00141	0.02039	0.00132	0.02081	0.00153	0.02259	0.00132	0.02041	0.00135
	405.846	158.964	0.01838	0.00348	0.02114	0.00157	0.01878	0.00127	0.02101	0.00155	0.01881	0.00121	0.02007	0.00135
	405.848	155.321	0.02305	0.00344	0.02271	0.00144	0.02448	0.00129	0.02344	0.00144	0.02539	0.00124	0.02453	0.00132
	405.84	169.892	0.01372	0.00323	0.02642	0.00189	0.02658	0.00163	0.02859	0.00194	0.02905	0.00162	0.03089	0.0018
	405.849	152.589	0.01603	0.00334	0.02208	0.00165	0.02404	0.00149	0.02555	0.00176	0.02168	0.00134	0.0235	0.0015
	405.861	131.644	0.01892	0.0033	0.01866	0.00138	0.01887	0.00119	0.01983	0.0014	0.02025	0.00117	0.02159	0.0013
	405.867	120.717	0.01352	0.0031	0.01803	0.00151	0.021	0.0014	0.02265	0.00167	0.02063	0.00132	0.02	0.0014
	405.887	83.3844	0.02746	0.00397	0.03383	0.00185	0.03236	0.00156	0.03298	0.00181	0.03372	0.00151	0.03107	0.00157
	405.887	83.3844	0.0319	0.00439	0.03262	0.00187	0.03609	0.0017	0.03201	0.00183	0.03449	0.00157	0.03499	0.00171
	405.877	101.595	0.01487	0.00286	0.01425	0.00118	0.0159	0.00107	0.01545	0.00121	0.01746	0.00106	0.01932	0.00121
	405.882	92.4895	0.02405	0.00371	0.0263	0.00163	0.02416	0.00135	0.02385	0.00154	0.02243	0.00123	0.02642	0.00144
	405.891	77.0109	0.03507	0.00435	0.04576	0.0021	0.0468	0.00183	0.04623	0.00209	0.04524	0.00171	0.04616	0.00186
	405.897	66.0853	0.06902	0.00634	0.07708	0.00283	0.07283	0.00238	0.07827	0.00283	0.07783	0.00233	0.07261	0.00243
	405.906	49.6974	0.12524	0.00944	0.17051	0.00471	0.16246	0.00399	0.15614	0.00445	0.15447	0.00369	0.15939	0.00403
	405.916	30.5792	0.26485	0.01405	0.26291	0.00604	0.24921	0.00511	0.24733	0.00579	0.24585	0.00483	0.23303	0.00503
	405.925	15.1032	0.48018	0.0212	0.54554	0.01005	0.52918	0.0087	0.53506	0.00984	0.54791	0.00848	0.54939	0.00905
	405.935	-4.01327	0.76776	0.02972	0.75208	0.01331	0.74049	0.0117	0.78619	0.01354	0.78046	0.01158	0.8054	0.01252
	405.93	5.08969	0.64639	0.02695	0.69449	0.0126	0.69066	0.01112	0.73312	0.01288	0.72941	0.011	0.76341	0.01202
	405.942	-16.757	0.63763	0.02707	0.57199	0.0114	0.55573	0.00988	0.56201	0.01117	0.56397	0.00952	0.57555	0.01027
	405.975	-75.9188	0.13941	0.01073	0.17564	0.00515	0.17539	0.00447	0.18658	0.00526	0.19002	0.00443	0.20227	0.00493
	405.99	-103.221	0.07772	0.00795	0.08462	0.00351	0.09232	0.00318	0.08498	0.00348	0.10111	0.00316	0.09524	0.0033
	406.001	-123.241	0.05342	0.00538	0.06115	0.00243	0.06556	0.00218	0.06714	0.00252	0.07826	0.00226	0.08264	0.0025
	405.935		1	0.03286	0.97049	0.01493	0.92715	0.01295	0.93197	0.01444	0.93541	0.01251	0.93413	0.01322
	405.937	-6.74411	0.82853	0.03203	0.81137	0.01442	0.73469	0.01206	0.76871	0.01384	0.75664	0.01176	0.76934	0.01262
	405.939	-10.3852	0.66268	0.02647	0.62022	0.01144	0.58241	0.00973	0.60751	0.0112	0.58394	0.00932	0.57999	0.00989
	405.935	-2.19269	0.92577	0.02456	0.85959	0.0108	0.84482	0.00951	0.86432	0.01074	0.86102	0.00923	0.85705	0.00975
	405.932	2.35878	0.97571	0.03019	1	0.01415	1	0.01264	1	0.01403	1	0.01215	1	0.01285

## Sheet: fig3
		Reference scheme 2nd step saturation study
		I	I	Gd-2C-ref	σ Gd-avg	Gd-152	σ Gd-152	Gd-154	σ Gd-154	Gd-155	σ Gd-155	Gd-156	σ Gd-156	Gd-157	σ Gd-157	Gd-158	σ Gd-158	Gd-160	σ Gd-160
		kW/cm^2/GHz	mJ/cm^2					Normalized Couts		Normalized Couts
		0	0	0.01421	0.00368	0.06593	0.02779	0.03596	0.0054	0.01057	0.00098257	0.01182	0.00102	0.00909	0.000895466	0.01035	0.00087652	0.00746	0.000802426
		6.1036	1.05287	0.08404	0.00997	0.25274	0.05899	0.10318	0.00943	0.07773	0.00275	0.08736	0.00286	0.0779	0.00271	0.08109	0.00254	0.07698	0.00267
		10.078	1.73846	0.14792	0.01369	0.25274	0.05899	0.17901	0.01284	0.13902	0.00378	0.14738	0.00382	0.13737	0.0037	0.14208	0.00345	0.14267	0.00374
		14.5493	2.50975	0.18898	0.0164	0.31868	0.06795	0.19152	0.01336	0.1873	0.00448	0.19401	0.00447	0.18398	0.00436	0.18963	0.00407	0.18744	0.00437
		23.4208	4.04009	0.23817	0.01871	0.27472	0.06203	0.24624	0.01549	0.22674	0.00501	0.24317	0.00511	0.23071	0.00498	0.2444	0.00473	0.23779	0.00502
		36.6216	6.31723	0.32611	0.02268	0.3956	0.07789	0.33614	0.01874	0.31681	0.00614	0.33422	0.0062	0.31233	0.00599	0.33254	0.0057	0.32461	0.00607
		53.5839	9.24323	0.46684	0.02866	0.56044	0.09803	0.47218	0.02331	0.4623	0.00782	0.46394	0.00766	0.4711	0.00778	0.47273	0.00715	0.45877	0.00757
		106.458	18.364	0.68205	0.03739	0.79121	0.12479	0.6606	0.02928	0.69409	0.01031	0.66787	0.00981	0.69794	0.01018	0.68494	0.00921	0.68686	0.00997
		212.916	36.7281	0.89489	0.04546	1	0.14825	0.86234	0.03543	0.92725	0.01271	0.8971	0.01212	0.91241	0.01235	0.89678	0.01118	0.87348	0.01184
		312.277	53.8678	1	0.04909	0.97802	0.1458	1	0.03954	1	0.01344	1	0.01314	1	0.01322	1	0.01212	1	0.01309
		1 color scheme saturation study
		I	I	Gd-2C-ref	σ Gd-avg	Gd-152	σ Gd-152	Gd-154	σ Gd-154	Gd-155	σ Gd-155	Gd-156	σ Gd-156	Gd-157	σ Gd-157	Gd-158	σ Gd-158	Gd-160	σ Gd-160
		kW/cm^2/GHz	mJ/cm^2					Normalized Couts		Normalized Couts
		323.243	80.6385	0.99913	0.1024	0.91292	0.17803	1	0.08143	1	0.02997	0.99477	0.02858	1	0.02845	1	0.02599	1	0.0258
		0	0	0.00434	0.00211	0.29647	0.06396	0.01412	0.00312	0.00331	0.000592341	0.00301	0.000488165	0.00203	0.000446906	0.00189	0.000360356	0.00169	0.000355249
		159.92	39.8948	0.696	0.06897	0.78021	0.14654	0.68775	0.05422	0.68027	0.01977	0.7039	0.0195	0.67474	0.01859	0.71909	0.01797	0.71027	0.01753
		34.0256	8.48826	0.22386	0.03279	0.55198	0.13641	0.1926	0.02279	0.22572	0.00965	0.23117	0.00896	0.22115	0.00894	0.25637	0.0089	0.21614	0.00776
		68.0511	16.9765	0.4008	0.04569	0.49695	0.11604	0.40092	0.03627	0.40802	0.01384	0.40679	0.01286	0.38593	0.01241	0.41577	0.01185	0.38738	0.01106
		204.153		0.80291	0.07094	0.99707	0.16464	0.78708	0.05511	0.82947	0.02166	0.81689	0.02047	0.79889	0.01971	0.81348	0.01836	0.77168	0.01683
		272.204	50.929	0.94782	0.09479	0.84001	0.15884	0.96041	0.07656	0.94171	0.02746	0.96938	0.02706	0.88649	0.02444	0.96786	0.02436	0.96105	0.02399
		102.077	25.464	0.54662	0.05725	0.81036	0.1633	0.54588	0.04558	0.57835	0.01777	0.56976	0.01659	0.52505	0.01528	0.55741	0.0146	0.50325	0.01306
		6.80511	1.69	0.02969	0.01004	0.52482	0.13784	0.03136	0.0083	0.03571	0.00352	0.03414	0.00292	0.02463	0.00268	0.02833	0.00236	0.02399	0.00222
		18.3738	4.58	0.12124	0.01985	0.63808	0.12711	0.14711	0.0185	0.11502	0.00595	0.12077	0.00559	0.1154	0.00571	0.11877	0.00502	0.11039	0.00486
		238.179	59.4179	0.96171	0.11721	1	0.21005	0.94543	0.09173	0.97973	0.03483	1	0.03383	0.96777	0.03268	0.98645	0.0302	0.89087	0.02754

## Sheet: fig4a
							broad wavelength scan second step
Wavelength (nm)	Gd-152	σ lambda	σ Gd-152	Gd-154	σ lambda	σ Gd-154	Gd-155	σ lambda	σ Gd-155	Gd-156	σ lambda	σ Gd-156	Gd-157	σ lambda	σ Gd-157	Gd-158	σ lambda	σ Gd-158	Gd-160	σ lambda	σ Gd-160
405.434	0.08133	0.003	0.08272	0.08766	0.003	0.02764	0.09224	0.003	0.01244	0.07864	0.003	0.00973	0.06759	0.003	0.01098	0.06449	0.003	0.00893	0.08128	0.003	0.00933
405.459	0.0721	0.003	0.10259	0.14869	0.003	0.0315	0.22587	0.003	0.01617	0.21768	0.003	0.0134	0.24448	0.003	0.01614	0.23175	0.003	0.013	0.21348	0.003	0.01275
405.484	0.50163	0.003	0.16726	0.57961	0.003	0.0518	0.49607	0.003	0.02057	0.47641	0.003	0.0172	0.51525	0.003	0.02041	0.50218	0.003	0.01678	0.49186	0.003	0.01699
405.509	0.29391	0.003	0.11631	0.27888	0.003	0.03318	0.3006	0.003	0.01498	0.2911	0.003	0.01247	0.28815	0.003	0.01418	0.27838	0.003	0.01155	0.29033	0.003	0.01202
405.534	0.20411	0.003	0.10631	0.14976	0.003	0.02852	0.13355	0.003	0.01202	0.1593	0.003	0.01063	0.13757	0.003	0.01167	0.13503	0.003	0.00949	0.10697	0.003	0.00881
405.559	0.25438	0.003	0.09978	0.25144	0.003	0.02907	0.20929	0.003	0.01169	0.19536	0.003	0.0095	0.19817	0.003	0.01104	0.19274	0.003	0.00896	0.19403	0.003	0.00911
405.584	0.85148	0.003	0.2594	0.37494	0.003	0.04553	0.34482	0.003	0.01883	0.30532	0.003	0.01503	0.31861	0.003	0.01752	0.31251	0.003	0.01438	0.30566	0.003	0.01453
405.609	0.97544	0.003	0.25423	0.93905	0.003	0.06709	0.92354	0.003	0.02911	0.93573	0.003	0.02547	0.92753	0.003	0.0284	0.93141	0.003	0.02406	0.94177	0.003	0.02494
405.634	0.25465	0.003	0.13341	0.30885	0.003	0.03955	0.24304	0.003	0.01542	0.26169	0.003	0.01341	0.26497	0.003	0.01545	0.27956	0.003	0.01313	0.24465	0.003	0.01253
405.659	0	0.003	0	0.06647	0.003	0.01875	0.09405	0.003	0.0091	0.07457	0.003	0.007	0.07574	0.003	0.00827	0.07879	0.003	0.00677	0.0791	0.003	0.00674
405.684	0.05811	0.003	0.08914	0.06562	0.003	0.02304	0.05947	0.003	0.01007	0.06135	0.003	0.00823	0.04086	0.003	0.00902	0.04144	0.003	0.0073	0.03863	0.003	0.00707
405.709	0.21322	0.003	0.09157	0.13725	0.003	0.02283	0.13555	0.003	0.01002	0.11918	0.003	0.00792	0.13393	0.003	0.00959	0.1213	0.003	0.00758	0.1118	0.003	0.0074
405.734	0.37853	0.003	0.13455	0.19619	0.003	0.02826	0.19162	0.003	0.01223	0.19581	0.003	0.01033	0.19173	0.003	0.01178	0.17684	0.003	0.00938	0.18618	0.003	0.00971
405.759	0.14729	0.003	0.08019	0.25879	0.003	0.02864	0.22089	0.003	0.01163	0.22588	0.003	0.00986	0.21907	0.003	0.01118	0.20698	0.003	0.00899	0.21335	0.003	0.00923
405.784	0.2532	0.003	0.10964	0.1438	0.003	0.02315	0.16579	0.003	0.01065	0.1704	0.003	0.00896	0.16098	0.003	0.01013	0.17317	0.003	0.00855	0.16526	0.003	0.00849
405.809	0.05427	0.003	0.05627	0.04186	0.003	0.01786	0.05413	0.003	0.00832	0.06223	0.003	0.00689	0.06113	0.003	0.00808	0.06522	0.003	0.00665	0.06836	0.003	0.00666
405.834	0.15402	0.003	0.08293	0.25422	0.003	0.02879	0.21425	0.003	0.01164	0.22609	0.003	0.01001	0.24032	0.003	0.01184	0.22874	0.003	0.00953	0.23925	0.003	0.0099
405.859	0.00331	0.003	0.05755	0.15477	0.003	0.02539	0.15371	0.003	0.01112	0.18571	0.003	0.00996	0.16293	0.003	0.01092	0.20984	0.003	0.00995	0.22545	0.003	0.01045
405.872	0.33363	0.003	0.10099	0.3152	0.003	0.02749	0.28423	0.003	0.01134	0.2826	0.003	0.00955	0.27987	0.003	0.01087	0.28095	0.003	0.00903	0.26812	0.003	0.00895
405.884	0.43574	0.003	0.11394	0.30474	0.003	0.0245	0.30867	0.003	0.01082	0.29434	0.003	0.00891	0.31243	0.003	0.01054	0.30276	0.003	0.00859	0.32364	0.003	0.00912
405.897	0.11521	0.003	0.06272	0.24369	0.003	0.02588	0.24226	0.003	0.0113	0.23709	0.003	0.0094	0.2299	0.003	0.01064	0.21811	0.003	0.00857	0.24368	0.003	0.00917
405.909	0.23015	0.003	0.08707	0.15028	0.003	0.02046	0.15717	0.003	0.00913	0.17867	0.003	0.00799	0.1585	0.003	0.00881	0.16753	0.003	0.00738	0.17042	0.003	0.0075
405.921	0.18523	0.003	0.07939	0.06071	0.003	0.01676	0.06683	0.003	0.00769	0.06767	0.003	0.00624	0.06233	0.003	0.00724	0.06232	0.003	0.00586	0.05878	0.003	0.00572
405.934	0.27129	0.003	0.08637	0.16867	0.003	0.01958	0.17851	0.003	0.00884	0.20168	0.003	0.00778	0.18656	0.003	0.00866	0.17875	0.003	0.00699	0.18454	0.003	0.00716
405.934	0.30614	0.003	0.08946	0.20451	0.003	0.02019	0.18413	0.003	0.0085	0.18857	0.003	0.00716	0.18015	0.003	0.0081	0.19121	0.003	0.00684	0.17628	0.003	0.00665
405.947	0.02969	0.003	0.04468	0.08979	0.003	0.01806	0.08742	0.003	0.008	0.106	0.003	0.0069	0.1012	0.003	0.00795	0.10401	0.003	0.00655	0.09564	0.003	0.00636
405.959	0.31928	0.003	0.11554	0.17719	0.003	0.02546	0.16442	0.003	0.01085	0.15654	0.003	0.00885	0.16272	0.003	0.01039	0.17312	0.003	0.00876	0.14185	0.003	0.00817
405.959	0.42596	0.003	0.14371	0.19052	0.003	0.02767	0.16513	0.003	0.01145	0.19247	0.003	0.01015	0.151	0.003	0.01066	0.17796	0.003	0.00932	0.16635	0.003	0.00916
405.984	0.16657	0.003	0.0802	0.11462	0.003	0.0198	0.14759	0.003	0.00952	0.1423	0.003	0.00778	0.12346	0.003	0.00861	0.12465	0.003	0.00705	0.11285	0.003	0.00684
406.009	0.36069	0.003	0.11426	0.31978	0.003	0.03024	0.32713	0.003	0.01336	0.30773	0.003	0.01094	0.31479	0.003	0.01265	0.33015	0.003	0.01079	0.32393	0.003	0.01089
406.034	0.15559	0.003	0.07182	0.07389	0.003	0.01716	0.08759	0.003	0.008	0.10726	0.003	0.00691	0.08664	0.003	0.00763	0.08965	0.003	0.00625	0.09143	0.003	0.00626
406.059	0.47389	0.003	0.14111	0.50488	0.003	0.04011	0.50898	0.003	0.0176	0.50585	0.003	0.01502	0.4926	0.003	0.01671	0.49664	0.003	0.01405	0.46843	0.003	0.01386
406.084	0.23465	0.003	0.08706	0.30945	0.003	0.02913	0.34994	0.003	0.01361	0.3767	0.003	0.01208	0.39258	0.003	0.01408	0.44105	0.003	0.01262	0.46865	0.003	0.01346
406.109	0.49828	0.003	0.14653	0.32328	0.003	0.03178	0.25186	0.003	0.01223	0.27512	0.003	0.01077	0.26785	0.003	0.01217	0.25616	0.003	0.00983	0.27623	0.003	0.01043
406.134	0.32309	0.003	0.10719	0.23206	0.003	0.02444	0.23075	0.003	0.01068	0.24474	0.003	0.00924	0.22975	0.003	0.01029	0.23279	0.003	0.00855	0.2285	0.003	0.00859
406.159	0.43512	0.003	0.13189	0.39728	0.003	0.0342	0.37401	0.003	0.01441	0.36565	0.003	0.01209	0.35317	0.003	0.01349	0.35152	0.003	0.0112	0.32109	0.003	0.01084
406.184	0.50094	0.003	0.13471	0.51799	0.003	0.0365	0.52681	0.003	0.01613	0.49059	0.003	0.01317	0.52137	0.003	0.01553	0.50606	0.003	0.01274	0.4873	0.003	0.01272
406.209	0.82872	0.003	0.22714	0.57637	0.003	0.04819	0.53472	0.003	0.02006	0.50932	0.003	0.01668	0.50916	0.003	0.01889	0.51023	0.003	0.01581	0.4731	0.003	0.01545
406.234	0.15693	0.003	0.0668	0.08392	0.003	0.01623	0.07862	0.003	0.00717	0.11213	0.003	0.00643	0.11835	0.003	0.00763	0.16231	0.003	0.00698	0.19143	0.003	0.00757
406.259	0.15117	0.003	0.07564	0.04742	0.003	0.01681	0.04138	0.003	0.00745	0.05688	0.003	0.00633	0.04738	0.003	0.00724	0.06283	0.003	0.00619	0.06438	0.003	0.00613
406.284	0.13866	0.003	0.07383	0.01818	0.003	0.01361	0.01635	0.003	0.00623	0.02159	0.003	0.00503	0.01794	0.003	0.00594	0.02149	0.003	0.00483	0.01958	0.003	0.00465
406.309	0.05999	0.003	0.04627	0.06439	0.003	0.0146	0.07467	0.003	0.00679	0.06383	0.003	0.00531	0.06616	0.003	0.00631	0.06417	0.003	0.00509	0.06337	0.003	0.005
406.334	0.0471	0.003	0.05767	0	0.003	0	0	0.003	0	0	0.003	0	0	0.003	0	0	0.003	0	0	0.003	0
406.359	0.22783	0.003	0.10029	0.04162	0.003	0.01799	0.05225	0.003	0.00844	0.04152	0.003	0.00654	0.05427	0.003	0.0081	0.03493	0.003	0.0061	0.04782	0.003	0.00631
406.384	0.07206	0.003	0.05015	0.0271	0.003	0.01341	0.0335	0.003	0.00627	0.03548	0.003	0.00504	0.03232	0.003	0.00593	0.03102	0.003	0.00476	0.03089	0.003	0.00463
406.409	0.05336	0.003	0.06681	0.09369	0.003	0.02093	0.12475	0.003	0.01009	0.09333	0.003	0.0076	0.11219	0.003	0.00938	0.09354	0.003	0.00725	0.08753	0.003	0.00708
406.434	0.16944	0.003	0.07917	0.06372	0.003	0.0177	0.1296	0.003	0.00951	0.10868	0.003	0.00741	0.12236	0.003	0.00896	0.11795	0.003	0.00723	0.09829	0.003	0.00683
406.459	0.392	0.003	0.12016	0.33341	0.003	0.0308	0.29709	0.003	0.01264	0.27604	0.003	0.01029	0.27666	0.003	0.01177	0.24877	0.003	0.00923	0.23816	0.003	0.00918
406.484	0.06395	0.003	0.06124	0.06954	0.003	0.02035	0.04127	0.003	0.00828	0.04327	0.003	0.00671	0.05029	0.003	0.00816	0.04251	0.003	0.00641	0.04859	0.003	0.00647

## Sheet: fig4b
	Wavelength (nm)	Shift (GHz)	Gd-152	Gd-152	σ lambda	σ Gd-152	Gd-154	Gd-154	σ lambda	σ Gd-154	Gd-155	σ lambda	σ Gd-155	Gd-156	σ lambda	σ Gd-156	Gd-157	σ lambda	σ Gd-157	Gd-158	σ lambda	σ Gd-158	Gd-160	σ lambda	σ Gd-160
	405.907	55	0.0122	0.01342	0.003	0.01225	0.00268	0.00282	0.003	0.0019	0.00231	0.003	0.00134	0.00172	0.003	0.00114	0.00154	0.003	0.00125	0	0.003	0	0	0.003	0
	405.909	50.448	0.01912	0.02103	0.003	0.01675	0.01402	0.01472	0.003	0.00344	0.00929	0.003	0.0017	0.00537	0.003	0.00132	0.00495	0.003	0.00144	0.00229	0.003	0.00115	0.0025	0.003	0.0011
	405.912	45.896	0.0471	0.0518	0.003	0.02316	0.01865	0.01958	0.003	0.00464	0.02312	0.003	0.00266	0.02151	0.003	0.00223	0.01649	0.003	0.00231	0.01442	0.003	0.00188	0.0094	0.003	0.00162
	405.914	41.3441	0.05936	0.0653	0.003	0.02225	0.05369	0.05637	0.003	0.00663	0.04878	0.003	0.00314	0.04341	0.003	0.00257	0.04256	0.003	0.00288	0.03271	0.003	0.00216	0.02523	0.003	0.00196
	405.917	36.7922	0.17779	0.19557	0.003	0.04575	0.08909	0.09355	0.003	0.01036	0.11684	0.003	0.00582	0.09708	0.003	0.00453	0.09248	0.003	0.00503	0.08108	0.003	0.00392	0.05768	0.003	0.0034
	405.92	32.2404	0.25517	0.28069	0.003	0.04078	0.16403	0.17223	0.003	0.01014	0.17359	0.003	0.00524	0.14642	0.003	0.00407	0.14791	0.003	0.00462	0.12357	0.003	0.00347	0.09316	0.003	0.00301
	405.922	27.6886	0.40501	0.44552	0.003	0.08299	0.3244	0.34062	0.003	0.0239	0.40454	0.003	0.01352	0.36774	0.003	0.01104	0.36208	0.003	0.01235	0.32883	0.003	0.00978	0.25364	0.003	0.00856
	405.925	23.1369	0.63156	0.69472	0.003	0.08334	0.53657	0.5634	0.003	0.02546	0.60073	0.003	0.01425	0.52982	0.003	0.0113	0.56295	0.003	0.01325	0.48747	0.003	0.0101	0.41644	0.003	0.00921
	405.927	18.5853	0.5606	0.61666	0.003	0.10461	0.57814	0.60704	0.003	0.03569	0.71394	0.003	0.02072	0.63392	0.003	0.01666	0.66763	0.003	0.01936	0.63292	0.003	0.01588	0.52887	0.003	0.0144
	405.93	14.0337	0.8261	0.90871	0.003	0.10284	0.80963	0.85012	0.003	0.03507	0.95623	0.003	0.02101	0.88752	0.003	0.01735	0.92238	0.003	0.01994	0.86088	0.003	0.01617	0.78779	0.003	0.01544
	405.932	9.48218	0.78091	0.859	0.003	0.1152	0.91482	0.96056	0.003	0.04415	0.97984	0.003	0.02409	0.92928	0.003	0.02032	0.99148	0.003	0.02383	0.94043	0.003	0.01962	0.93139	0.003	0.02004
	405.935	4.93071	1	1.1	0.003	0.12417	1	1.05	0.003	0.04311	0.99307	0.003	0.02244	0.91823	0.003	0.01849	0.9959	0.003	0.02202	0.94985	0.003	0.0182	0.90444	0.003	0.01798
	405.937	0.37929	0.52364	0.57601	0.003	0.0905	0.81748	0.85835	0.003	0.0418	0.99603	0.003	0.02498	0.99548	0.003	0.02198	0.97912	0.003	0.02415	0.99426	0.003	0.02102	0.9955	0.003	0.02164
	405.94	-4.17207	0.40633	0.44696	0.003	0.07096	0.78223	0.82134	0.003	0.03789	0.93006	0.003	0.02237	0.91411	0.003	0.0194	0.95428	0.003	0.02237	0.99168	0.003	0.01984	0.96836	0.003	0.02002
	405.942	-8.72338	0.30889	0.33978	0.003	0.05864	0.46177	0.48486	0.003	0.02526	0.67304	0.003	0.01688	0.68275	0.003	0.01497	0.73347	0.003	0.01768	0.76995	0.003	0.01574	0.8165	0.003	0.01699
	405.945	-13.2746	0.32722	0.35994	0.003	0.07023	0.35994	0.37794	0.003	0.02503	0.59471	0.003	0.01737	0.61292	0.003	0.01553	0.66608	0.003	0.01847	0.72361	0.003	0.01677	0.74096	0.003	0.01759
	405.947	-17.8258	0.08252	0.09077	0.003	0.03123	0.26573	0.27902	0.003	0.01727	0.36786	0.003	0.01064	0.40727	0.003	0.00998	0.41871	0.003	0.01143	0.51391	0.003	0.0113	0.5713	0.003	0.01263
	405.95	-22.377	0.07333	0.08067	0.003	0.03187	0.15058	0.15811	0.003	0.01515	0.22556	0.003	0.00924	0.28739	0.003	0.00929	0.27074	0.003	0.01013	0.34388	0.003	0.00993	0.39911	0.003	0.01132
	405.952	-26.928	0.033	0.03629	0.003	0.02113	0.08106	0.08511	0.003	0.01035	0.11538	0.003	0.00604	0.13769	0.003	0.00575	0.1545	0.003	0.00696	0.18829	0.003	0.00655	0.23948	0.003	0.00782
	405.954	-31.4791	0.02665	0.02932	0.003	0.02087	0.02052	0.02155	0.003	0.00569	0.04184	0.003	0.00401	0.05026	0.003	0.00373	0.04874	0.003	0.00421	0.07316	0.003	0.00425	0.09971	0.003	0.00512
	405.957	-36.03	0.01423	0.01565	0.003	0.01332	0.01252	0.01315	0.003	0.00343	0.01183	0.003	0.00189	0.01101	0.003	0.00161	0.01882	0.003	0.00214	0.0259	0.003	0.00204	0.03096	0.003	0.00221
	405.959	-40.5809	0.01055	0.01161	0.003	0.01366	0.0058	0.00609	0.003	0.00293	0.00442	0.003	0.00173	0.0061	0.003	0.00161	0.00755	0.003	0.00189	0.00996	0.003	0.00179	0.02093	0.003	0.00223
	405.962	-45.1318	0	0	0.003	0	0	0	0.003	0	0.00138	0.003	0.00155	0	0.003	0	0.000787468	0.003	0.00145	0.000293777	0.003	0.00129	0.00162	0.003	0.00129
	405.964	-49.6826	0	0	0.003	0	0.008	0.00841	0.003	0.00354	0	0.003	0	0.000650554	0.003	0.00131	0	0.003	0	0.000333673	0.003	0.00137	0.00107	0.003	0.00125

## Sheet: fig4c
	Wavelength (nm)	Shift (GHz)	Gd-152	σ lambda	σ Gd-152	Gd-154	σ lambda	σ Gd-154	Gd-155	σ lambda	σ Gd-155	Gd-156	σ lambda	σ Gd-156	Gd-157	σ lambda	σ Gd-157	Gd-158	σ lambda	σ Gd-158	Gd-160	σ lambda	σ Gd-160
	405.65	-72.69	0.06134	0.003	0.04719	0.02382	0.003	0.01441	0.03473	0.003	0.00701	0.03665	0.003	0.00644	0.04646	0.003	0.0071	0.03027	0.003	0.00596	0.02469	0.003	0.00613
	405.647	-68.1321	0.08404	0.003	0.04712	0.05883	0.003	0.01524	0.06516	0.003	0.00721	0.05834	0.003	0.00645	0.05808	0.003	0.0069	0.05321	0.003	0.00599	0.05575	0.003	0.0063
	405.645	-63.5742	0.14608	0.003	0.05173	0.06094	0.003	0.01467	0.07478	0.003	0.00708	0.06241	0.003	0.00624	0.07095	0.003	0.00685	0.07205	0.003	0.00602	0.05584	0.003	0.00605
	405.642	-59.0162	0.02641	0.003	0.03374	0.06048	0.003	0.01577	0.04571	0.003	0.00702	0.05253	0.003	0.00653	0.04576	0.003	0.00686	0.05467	0.003	0.00617	0.04188	0.003	0.00624
	405.64	-54.4582	0.25351	0.003	0.0928	0.07983	0.003	0.01989	0.11651	0.003	0.01013	0.10672	0.003	0.00892	0.1185	0.003	0.00996	0.10462	0.003	0.0083	0.10177	0.003	0.00865
	405.637	-49.9001	0.13635	0.003	0.05299	0.06929	0.003	0.0158	0.11873	0.003	0.00833	0.10874	0.003	0.00735	0.1055	0.003	0.00788	0.11496	0.003	0.00701	0.10077	0.003	0.00709
	405.635	-45.342	0.07573	0.003	0.0478	0.11624	0.003	0.02014	0.10142	0.003	0.00893	0.1058	0.003	0.00816	0.11159	0.003	0.00896	0.11631	0.003	0.00783	0.1052	0.003	0.00801
	405.632	-40.7838	0.17221	0.003	0.06377	0.14139	0.003	0.01902	0.13514	0.003	0.00863	0.14019	0.003	0.00787	0.13135	0.003	0.00837	0.12934	0.003	0.00721	0.11357	0.003	0.00728
	405.63	-36.2255	0.23359	0.003	0.07071	0.19936	0.003	0.02235	0.22644	0.003	0.01085	0.20606	0.003	0.00935	0.20544	0.003	0.01019	0.209	0.003	0.0088	0.20006	0.003	0.00905
	405.627	-31.6672	0.28473	0.003	0.0794	0.30712	0.003	0.02672	0.31857	0.003	0.01258	0.32331	0.003	0.01131	0.32631	0.003	0.01245	0.30784	0.003	0.01033	0.27743	0.003	0.01026
	405.625	-27.1089	0.39052	0.003	0.09516	0.34055	0.003	0.02884	0.39714	0.003	0.01452	0.41884	0.003	0.01335	0.39961	0.003	0.01425	0.41655	0.003	0.01246	0.39501	0.003	0.01262
	405.623	-22.5505	0.61787	0.003	0.12505	0.57494	0.003	0.0378	0.59481	0.003	0.01805	0.56077	0.003	0.01543	0.55751	0.003	0.01689	0.54992	0.003	0.01427	0.53393	0.003	0.01459
	405.62	-17.992	0.79869	0.003	0.17526	0.74774	0.003	0.05344	0.77583	0.003	0.02567	0.75686	0.003	0.0225	0.77574	0.003	0.02511	0.74634	0.003	0.02089	0.73839	0.003	0.0216
	405.618	-13.4334	0.93356	0.003	0.16276	0.92795	0.003	0.05101	0.88458	0.003	0.0232	0.83786	0.003	0.01978	0.8423	0.003	0.02185	0.82254	0.003	0.01826	0.79782	0.003	0.01856
	405.615	-8.87485	0.81173	0.003	0.14598	0.81718	0.003	0.04629	0.91427	0.003	0.02381	0.90359	0.003	0.02098	0.88812	0.003	0.02277	0.89839	0.003	0.01956	0.8864	0.003	0.02014
	405.613	-4.3162	0.97213	0.003	0.17397	0.80765	0.003	0.04767	0.90555	0.003	0.02448	0.85625	0.003	0.02086	0.87848	0.003	0.0234	0.85878	0.003	0.01959	0.86399	0.003	0.02048
	405.61	0.2425	0.81449	0.003	0.13835	0.84875	0.003	0.04525	0.90531	0.003	0.0225	0.87176	0.003	0.01939	0.91356	0.003	0.02218	0.90537	0.003	0.01872	0.90488	0.003	0.01945
	405.608	4.80126	0.66892	0.003	0.13299	0.72206	0.003	0.04473	0.84813	0.003	0.02364	0.81627	0.003	0.02044	0.8142	0.003	0.02243	0.85346	0.003	0.0198	0.83831	0.003	0.02033
	405.605	9.36008	0.61628	0.003	0.13731	0.67466	0.003	0.04537	0.77806	0.003	0.02343	0.78314	0.003	0.02096	0.79689	0.003	0.02332	0.8274	0.003	0.02043	0.845	0.003	0.02161
	405.603	13.919	0.46302	0.003	0.09531	0.51904	0.003	0.03289	0.64798	0.003	0.01797	0.66347	0.003	0.01627	0.66171	0.003	0.01786	0.6774	0.003	0.01547	0.68314	0.003	0.0162
	405.6	18.4779	0.22271	0.003	0.07414	0.30812	0.003	0.02917	0.48213	0.003	0.01725	0.50098	0.003	0.01573	0.47177	0.003	0.01664	0.53523	0.003	0.01535	0.54834	0.003	0.01626
	405.598	23.0369	0.2675	0.003	0.08062	0.42966	0.003	0.03202	0.42111	0.003	0.01466	0.42067	0.003	0.01305	0.4586	0.003	0.0151	0.42434	0.003	0.01228	0.44838	0.003	0.01327
	405.595	27.5959	0.28294	0.003	0.07897	0.31723	0.003	0.02712	0.39391	0.003	0.01412	0.39948	0.003	0.01269	0.41715	0.003	0.01429	0.4195	0.003	0.01224	0.42473	0.003	0.01287
	405.592	32.155	0.25768	0.003	0.06885	0.27028	0.003	0.02316	0.3096	0.003	0.01148	0.32836	0.003	0.01059	0.3354	0.003	0.01173	0.35511	0.003	0.01036	0.35422	0.003	0.0108
	405.59	36.7141	0.2883	0.003	0.07334	0.2598	0.003	0.02321	0.29234	0.003	0.01137	0.30326	0.003	0.01035	0.29744	0.003	0.01121	0.32852	0.003	0.01012	0.31746	0.003	0.01037
	405.587	41.2734	0.31972	0.003	0.08209	0.25641	0.003	0.02385	0.30012	0.003	0.01187	0.3146	0.003	0.01086	0.31817	0.003	0.01198	0.33252	0.003	0.01048	0.32113	0.003	0.01075
	405.585	45.8326	0.26225	0.003	0.07642	0.25307	0.003	0.02449	0.28846	0.003	0.01199	0.27812	0.003	0.01053	0.29786	0.003	0.01192	0.27868	0.003	0.00987	0.28257	0.003	0.01039
	405.582	50.3919	0.10034	0.003	0.04711	0.15773	0.003	0.01993	0.21528	0.003	0.01037	0.20372	0.003	0.00908	0.20216	0.003	0.00987	0.20577	0.003	0.00855	0.19272	0.003	0.00871
	405.577	59.5108	0.10698	0.003	0.04919	0.15428	0.003	0.02013	0.17551	0.003	0.00971	0.17157	0.003	0.00865	0.17378	0.003	0.00946	0.17082	0.003	0.00809	0.16265	0.003	0.00833
	405.572	68.6298	0.09942	0.003	0.04265	0.09694	0.003	0.01573	0.11225	0.003	0.00753	0.11909	0.003	0.00693	0.13297	0.003	0.00774	0.13822	0.003	0.0068	0.12293	0.003	0.00687
	405.565	82.3088	0.07431	0.003	0.04369	0.03991	0.003	0.01396	0.07473	0.003	0.00717	0.05663	0.003	0.00623	0.05289	0.003	0.00661	0.05758	0.003	0.00588	0.05118	0.003	0.00605
	405.56	91.4284	0.0923	0.003	0.04581	0.06884	0.003	0.01504	0.08972	0.003	0.00737	0.06972	0.003	0.00637	0.08198	0.003	0.00707	0.07784	0.003	0.00612	0.07047	0.003	0.00628

## Sheet: fig5
	Step 1 saturation
	Fluence	Gd-avg	σ Gd-avg	Gd-152	σ Gd-152	Gd-154	σ Gd-154	Gd-155	σ Gd-155	Gd-156	σ Gd-156	Gd-157	σ Gd-157	Gd-158	σ Gd-158	Gd-160	σ Gd-160
	(mJ/cm^2)
	7.87409	0.97445	0.03869	1	0.13516	0.96927	0.02949	1	0.01263	1	0.01118	0.99474	0.01205	0.96101	0.00983	0.92169	0.00986
	0	0.00389	0.00228	0.00939	0.00707	0.00159	0.000795317	0.00462	0.000654749	0.00438	0.000552801	0.00336	0.000565707	0.00568	0.000596799	0.00375	0.000480799
	0.4252	0.67258	0.02335	0.11215	0.01611	0.47358	0.0119	0.66346	0.00778	0.69805	0.00736	0.74389	0.00838	0.7378	0.00721	0.71869	0.0073
	0.70867	0.86111	0.04269	0.3677	0.05488	0.69203	0.02628	0.87397	0.01381	0.90764	0.01265	0.91236	0.01376	0.90479	0.01159	0.87588	0.01177
	2.03151	0.95112	0.05357	0.59316	0.10681	0.85558	0.03759	0.96889	0.01705	0.96999	0.01494	1	0.01673	0.97029	0.01359	0.94196	0.01393
	3.65358	0.84221	0.03264	0.65724	0.08274	0.75441	0.02227	0.84964	0.01051	0.86146	0.00944	0.87361	0.01044	0.88254	0.00892	0.83161	0.00881
	5.32288	0.87029	0.04294	0.73086	0.11206	0.81592	0.03028	0.86991	0.01387	0.90849	0.01299	0.90507	0.0139	0.8804	0.01155	0.84193	0.01163
	6.58274	0.95583	0.05746	0.43287	0.07415	0.84565	0.03881	0.94458	0.0179	0.97974	0.01666	0.99661	0.01839	1	0.01581	0.96838	0.01589
	2.67719	0.84147	0.09932	0.37713	0.13726	0.71212	0.06703	0.84808	0.03034	0.86888	0.02676	0.87311	0.02964	0.88528	0.02498	0.86132	0.02574
	1.29135	0.98347	0.10088	0.32911	0.09223	1	0.08081	0.99053	0.03124	0.98908	0.02735	0.95781	0.02891	0.96341	0.02423	1	0.02627
	Step 2 saturation
	Fluence	Gd-avg	σ Gd-avg	Gd-152	σ Gd-152	Gd-154	σ Gd-154	Gd-155	σ Gd-155	Gd-156	σ Gd-156	Gd-157	σ Gd-157	Gd-158	σ Gd-158	Gd-160	σ Gd-160
	(mJ/cm^2)
	58.9268	0.93936	0.03975	1	0.13689	0.85771	0.02715	0.94896	0.01315	0.94098	0.01158	0.96861	0.0129	0.95161	0.01081	0.96828	0.0114
	28.2007	0.94351	0.05069	0.80345	0.1419	0.93315	0.03875	0.93314	0.01581	0.95519	0.01419	0.95135	0.01551	0.93982	0.01277	0.94842	0.01352
	13.8899	0.82638	0.03428	0.57331	0.06415	0.82485	0.02443	0.82039	0.01159	0.81683	0.0104	0.8264	0.01137	0.83628	0.0099	0.8335	0.01028
	6.87479	0.67651	0.02974	0.38726	0.05231	0.57347	0.0189	0.69953	0.00999	0.70431	0.00898	0.69349	0.00961	0.69901	0.00819	0.68925	0.00844
	3.22694	0.5296	0.02723	0.39986	0.06142	0.46769	0.01823	0.52584	0.00874	0.54284	0.00785	0.54852	0.00883	0.54576	0.00734	0.54695	0.00772
	1.26272	0.41061	0.02418	0.20063	0.03441	0.38106	0.01684	0.41906	0.00805	0.42609	0.00722	0.42495	0.00788	0.408	0.00638	0.40447	0.00663
	0	0.11615	0.00902	0.08886	0.01777	0.10313	0.00603	0.12427	0.00307	0.12785	0.00276	0.1134	0.00284	0.121	0.00246	0.10728	0.0024
	42.7921	1	0.04983	0.74423	0.12437	1	0.03835	1	0.01583	1	0.01388	1	0.01512	1	0.01274	1	0.01337
	20.0632	0.8507	0.04238	0.77035	0.11335	0.87643	0.03305	0.8481	0.0136	0.83358	0.01185	0.86129	0.01337	0.81994	0.0107	0.86484	0.01191

## Sheet: fig6
		Gd isotope	152	σ 152	154	σ 154	155	σ 155	156	σ 156	157	σ 157	158	σ 158	160	σ 160	ion count sums	σ ion count sums
	2-color (reference)	ion counts	87.0011	9.43404	1543.26	39.2843	9178.99	95.8279	11579.4	107.673	10315.2	101.642	13939.9	118.237	13146.6	114.746	59790.3	586.844
		relative abundance	0.0014551	0.000158431	0.0258112	0.000704184	0.15352	0.00219982	0.193666	0.00261844	0.172522	0.00239943	0.233147	0.00302442	0.219878	0.002888
		delta from natural	-0.272448	0.0504982	0.183999	0.00529612	0.0372949	0.00058054	-0.0539009	0.000733027	0.10238	0.00144773	-0.0614048	0.000820735	0.00584664	7.7211e-05
	1- color scheme	ion counts	169.001	13.0001	1167.1	34.1628	7450.72	86.3176	10237	101.178	7975.3	89.3045	12315.1	110.974	11104.2	105.377	50418.5	540.313
		relative abundance	0.00335198	0.000260333	0.0231482	0.000721567	0.147778	0.00233217	0.203041	0.00296001	0.158182	0.00245173	0.244258	0.00342001	0.220241	0.00315261
		delta from natural	0.675988	0.114184	0.0618431	0.00200951	-0.00150239	2.54094e-05	-0.00810524	0.000118757	0.0107479	0.000168837	-0.0166743	0.000239564	0.00750772	0.000107961
	2-color new scheme	ion counts	18.0001	4.24265	244.007	15.6207	1593.27	39.9158	2192.54	46.8245	1720.33	41.4769	2593.72	51.0071	2317.57	48.1412	10679.4	247.229
		relative abundance	0.00168549	0.000399184	0.0228483	0.00155539	0.14919	0.00508903	0.205305	0.00646632	0.161088	0.00538431	0.242871	0.00737727	0.217013	0.00674978
		delta from natural	-0.157256	0.0440853	0.0480882	0.00330318	0.00804179	0.000278639	0.0029533	9.31185e-05	0.029317	0.000982771	-0.0222591	0.000679915	-0.00726211	0.000226094
	natural	abundance	0.002	0.0003	0.0218	0.0002	0.148	0.0009	0.2047	0.0003	0.1565	0.0004	0.2484	0.0008	0.2186	0.0003

## Sheet: fig7_raw_spectra
# Mass (amu)	reference (80 mJ/cm2)		# Mass (amu)	New 2C (28 mJ/cm2)
141.697	1		141.22	1
141.701	0		141.224	0
141.705	0		141.228	0
141.709	0		141.232	0
141.713	0		141.235	0
141.717	0		141.239	0
141.721	0		141.243	0
141.725	0		141.247	0
141.729	0		141.251	0
141.733	0		141.255	0
141.737	0		141.259	0
141.741	0		141.263	0
141.745	0		141.267	0
141.749	0		141.27	0
141.753	0		141.274	0
141.757	0		141.278	0
141.761	0		141.282	0
141.765	0		141.286	0
141.768	0		141.29	0
141.772	0		141.294	0
141.776	0		141.298	0
141.78	0		141.301	0
141.784	0		141.305	0
141.788	0		141.309	0
141.792	0		141.313	0
141.796	0		141.317	0
141.8	0		141.321	0
141.804	0		141.325	0
141.808	0		141.329	0
141.812	1		141.333	0
141.816	0		141.336	0
141.82	8.00007		141.34	0
141.824	2.00003		141.344	0
141.828	3.00002		141.348	0
141.832	11.0002		141.352	0
141.836	11.0004		141.356	0
141.84	10.0003		141.36	0
141.844	16.0005		141.364	0
141.847	12.0004		141.367	0
141.851	20.0008		141.371	0
141.855	20.0011		141.375	0
141.859	29.0017		141.379	0
141.863	26.0019		141.383	0
141.867	25.0017		141.387	0
141.871	30.0024		141.391	0
141.875	24.0019		141.395	1
141.879	29.002		141.398	0
141.883	22.0017		141.402	0
141.887	22.0012		141.406	0
141.891	21.0013		141.41	0
141.895	37.0028		141.414	0
141.899	28.0021		141.418	0
141.903	20.0015		141.422	0
141.907	25.0015		141.426	0
141.911	25.0017		141.43	0
141.915	21.0013		141.433	0
141.919	17.0009		141.437	0
141.923	17.0009		141.441	0
141.926	18.0007		141.445	0
141.93	9.00039		141.449	0
141.934	20.0007		141.453	0
141.938	7.00027		141.457	0
141.942	16.0005		141.461	0
141.946	4.00008		141.464	0
141.95	7.0001		141.468	0
141.954	8.00016		141.472	0
141.958	9.00021		141.476	0
141.962	6.00014		141.48	0
141.966	4.00004		141.484	0
141.97	7.00011		141.488	0
141.974	9.00018		141.492	0
141.978	7.00015		141.496	0
141.982	3.00004		141.499	0
141.986	2.00002		141.503	0
141.99	3.00002		141.507	0
141.994	3.00002		141.511	0
141.998	5.00006		141.515	0
142.002	1.00001		141.519	0
142.006	0		141.523	0
142.009	1		141.527	0
142.013	2.00001		141.531	0
142.017	3.00002		141.534	0
142.021	3.00002		141.538	0
142.025	0		141.542	0
142.029	1		141.546	0
142.033	3.00002		141.55	0
142.037	0		141.554	0
142.041	1		141.558	0
142.045	2.00001		141.562	0
142.049	1.00001		141.565	0
142.053	1		141.569	0
142.057	0		141.573	0
142.061	1		141.577	0
142.065	0		141.581	0
142.069	1		141.585	0
142.073	2.00001		141.589	0
142.077	1.00001		141.593	0
142.081	1		141.597	0
142.085	0		141.6	0
142.089	0		141.604	0
142.093	1		141.608	0
142.096	0		141.612	0
142.1	0		141.616	0
142.104	1		141.62	0
142.108	0		141.624	0
142.112	2.00001		141.628	0
142.116	0		141.632	0
142.12	0		141.635	0
142.124	0		141.639	0
142.128	1		141.643	0
142.132	0		141.647	0
142.136	0		141.651	0
142.14	0		141.655	0
142.144	0		141.659	0
142.148	1		141.663	0
142.152	0		141.666	0
142.156	1		141.67	0
142.16	0		141.674	0
142.164	0		141.678	0
142.168	0		141.682	0
142.172	0		141.686	0
142.176	0		141.69	0
142.18	0		141.694	0
142.183	0		141.698	0
142.187	0		141.701	0
142.191	0		141.705	0
142.195	0		141.709	0
142.199	0		141.713	0
142.203	0		141.717	0
142.207	0		141.721	0
142.211	0		141.725	0
142.215	0		141.729	0
142.219	0		141.733	0
142.223	0		141.736	0
142.227	1		141.74	0
142.231	0		141.744	0
142.235	0		141.748	0
142.239	0		141.752	0
142.243	0		141.756	0
142.247	0		141.76	0
142.251	0		141.764	0
142.255	0		141.768	0
142.259	0		141.771	0
142.263	0		141.775	0
142.267	0		141.779	0
142.271	0		141.783	0
142.274	0		141.787	0
142.278	1		141.791	0
142.282	0		141.795	0
142.286	0		141.799	0
142.29	0		141.803	0
142.294	0		141.806	0
142.298	0		141.81	0
142.302	0		141.814	0
142.306	0		141.818	0
142.31	0		141.822	0
142.314	0		141.826	0
142.318	0		141.83	0
142.322	0		141.834	0
142.326	0		141.838	0
142.33	0		141.841	0
142.334	0		141.845	0
142.338	0		141.849	0
142.342	0		141.853	0
142.346	0		141.857	0
142.35	0		141.861	0
142.354	0		141.865	0
142.358	0		141.869	0
142.362	0		141.873	0
142.365	0		141.876	0
142.369	0		141.88	0
142.373	0		141.884	0
142.377	0		141.888	0
142.381	0		141.892	0
142.385	0		141.896	0
142.389	0		141.9	0
142.393	0		141.904	0
142.397	0		141.908	0
142.401	0		141.911	0
142.405	0		141.915	0
142.409	0		141.919	0
142.413	0		141.923	0
142.417	0		141.927	0
142.421	0		141.931	0
142.425	0		141.935	0
142.429	0		141.939	0
142.433	0		141.943	0
142.437	0		141.946	0
142.441	0		141.95	0
142.445	1		141.954	0
142.449	0		141.958	0
142.453	0		141.962	0
142.457	0		141.966	0
142.46	0		141.97	0
142.464	0		141.974	0
142.468	0		141.978	0
142.472	0		141.981	0
142.476	0		141.985	0
142.48	0		141.989	0
142.484	0		141.993	0
142.488	0		141.997	0
142.492	0		142.001	0
142.496	0		142.005	0
142.5	0		142.009	0
142.504	0		142.013	0
142.508	0		142.016	0
142.512	0		142.02	1
142.516	0		142.024	1
142.52	0		142.028	1
142.524	0		142.032	1
142.528	0		142.036	5.00004
142.532	0		142.04	7.00011
142.536	0		142.044	9.00023
142.54	0		142.048	13.0004
142.544	0		142.051	12.0004
142.548	0		142.055	25.0011
142.552	0		142.059	16.001
142.556	0		142.063	18.0009
142.559	0		142.067	21.0011
142.563	0		142.071	21.0012
142.567	0		142.075	34.0024
142.571	0		142.079	36.0034
142.575	0		142.083	30.0025
142.579	0		142.086	32.0027
142.583	0		142.09	32.0029
142.587	0		142.094	37.0033
142.591	0		142.098	42.0044
142.595	0		142.102	41.0047
142.599	0		142.106	36.004
142.603	0		142.11	42.0039
142.607	0		142.114	39.0042
142.611	0		142.118	47.0054
142.615	0		142.122	48.0062
142.619	0		142.125	35.0041
142.623	0		142.129	36.0034
142.627	0		142.133	32.0033
142.631	0		142.137	36.0033
142.635	0		142.141	27.0022
142.639	0		142.145	26.002
142.643	0		142.149	22.0014
142.647	0		142.153	30.0021
142.651	0		142.157	32.0027
142.655	0		142.16	30.0025
142.659	0		142.164	28.0021
142.662	0		142.168	28.0023
142.666	0		142.172	21.0012
142.67	0		142.176	17.0009
142.674	0		142.18	23.0013
142.678	0		142.184	19.0011
142.682	0		142.188	17.0008
142.686	0		142.192	20.0009
142.69	0		142.195	24.0014
142.694	0		142.199	25.0015
142.698	0		142.203	21.0014
142.702	0		142.207	15.0008
142.706	0		142.211	22.001
142.71	0		142.215	20.0012
142.714	0		142.219	17.0009
142.718	0		142.223	16.0007
142.722	0		142.227	17.0007
142.726	0		142.231	11.0004
142.73	0		142.234	10.0003
142.734	0		142.238	14.0004
142.738	0		142.242	12.0004
142.742	0		142.246	10.0003
142.746	0		142.25	6.00014
142.75	0		142.254	8.00015
142.754	0		142.258	10.0002
142.758	0		142.262	8.0002
142.762	0		142.266	8.00017
142.766	0		142.269	11.0003
142.769	0		142.273	5.0001
142.773	0		142.277	6.00009
142.777	0		142.281	9.00019
142.781	0		142.285	5.00009
142.785	0		142.289	4.00005
142.789	0		142.293	9.00015
142.793	0		142.297	4.0001
142.797	0		142.301	5.00007
142.801	0		142.304	3.00003
142.805	0		142.308	3.00002
142.809	0		142.312	7.00008
142.813	0		142.316	4.00007
142.817	0		142.32	4.00004
142.821	0		142.324	3.00003
142.825	2		142.328	3.00003
142.829	1.00001		142.332	6.00008
142.833	5.00003		142.336	5.00005
142.837	6.00006		142.34	2.00002
142.841	6.0001		142.343	1.00001
142.845	7.00012		142.347	2
142.849	16.0005		142.351	3.00002
142.853	5.00016		142.355	1
142.857	9.00017		142.359	1
142.861	9.00019		142.363	4.00002
142.865	13.0004		142.367	5.00006
142.869	8.00027		142.371	5.00007
142.873	13.0004		142.375	1.00001
142.877	16.0006		142.379	2.00001
142.88	18.0009		142.382	0
142.884	12.0005		142.386	3.00001
142.888	12.0003		142.39	2.00002
142.892	11.0004		142.394	4.00003
142.896	16.0006		142.398	0
142.9	14.0006		142.402	1
142.904	12.0004		142.406	2.00001
142.908	13.0005		142.41	1.00001
142.912	16.0006		142.414	0
142.916	13.0005		142.417	1
142.92	4.00013		142.421	0
142.924	6.00009		142.425	2
142.928	4.00005		142.429	0
142.932	7.00009		142.433	1
142.936	4.00006		142.437	2.00001
142.94	5.00007		142.441	1.00001
142.944	3.00004		142.445	2.00001
142.948	5.00005		142.449	1
142.952	3.00003		142.453	0
142.956	4.00004		142.456	4.00002
142.96	4.00004		142.46	0
142.964	4.00004		142.464	1
142.968	3.00004		142.468	1
142.972	4.00004		142.472	1
142.976	4.00004		142.476	0
142.98	2.00001		142.48	0
142.984	1.00001		142.484	1
142.988	5.00004		142.488	0
142.992	2.00002		142.492	0
142.995	3.00002		142.495	0
142.999	1.00001		142.499	1
143.003	1.00001		142.503	1
143.007	0		142.507	1
143.011	2		142.511	1
143.015	0		142.515	0
143.019	3.00001		142.519	0
143.023	1.00001		142.523	0
143.027	1.00001		142.527	0
143.031	0		142.53	1
143.035	0		142.534	0
143.039	1		142.538	1
143.043	2.00001		142.542	0
143.047	1		142.546	0
143.051	0		142.55	1
143.055	1		142.554	1
143.059	1		142.558	0
143.063	1		142.562	0
143.067	0		142.566	1
143.071	0		142.569	0
143.075	0		142.573	0
143.079	1		142.577	0
143.083	0		142.581	0
143.087	0		142.585	0
143.091	0		142.589	0
143.095	0		142.593	0
143.099	0		142.597	0
143.103	0		142.601	0
143.107	0		142.605	0
143.111	1		142.608	1
143.115	1		142.612	0
143.118	0		142.616	0
143.122	0		142.62	1
143.126	0		142.624	0
143.13	0		142.628	0
143.134	0		142.632	0
143.138	0		142.636	0
143.142	0		142.64	0
143.146	1		142.644	0
143.15	0		142.647	0
143.154	0		142.651	0
143.158	0		142.655	0
143.162	0		142.659	0
143.166	0		142.663	0
143.17	0		142.667	1
143.174	1		142.671	0
143.178	0		142.675	0
143.182	0		142.679	0
143.186	0		142.683	0
143.19	0		142.686	0
143.194	0		142.69	0
143.198	0		142.694	0
143.202	0		142.698	0
143.206	1		142.702	0
143.21	0		142.706	0
143.214	0		142.71	1
143.218	0		142.714	0
143.222	0		142.718	1
143.226	0		142.722	0
143.23	0		142.725	0
143.234	0		142.729	0
143.238	0		142.733	0
143.242	0		142.737	1
143.246	0		142.741	0
143.249	0		142.745	0
143.253	0		142.749	0
143.257	0		142.753	1
143.261	0		142.757	0
143.265	0		142.761	0
143.269	0		142.764	0
143.273	0		142.768	1
143.277	0		142.772	0
143.281	0		142.776	0
143.285	0		142.78	0
143.289	0		142.784	0
143.293	0		142.788	1
143.297	0		142.792	0
143.301	0		142.796	0
143.305	0		142.8	0
143.309	0		142.803	0
143.313	0		142.807	0
143.317	0		142.811	0
143.321	0		142.815	0
143.325	0		142.819	0
143.329	0		142.823	0
143.333	0		142.827	0
143.337	0		142.831	0
143.341	0		142.835	0
143.345	0		142.839	0
143.349	0		142.842	0
143.353	0		142.846	0
143.357	0		142.85	0
143.361	0		142.854	0
143.365	0		142.858	0
143.369	0		142.862	0
143.373	0		142.866	1
143.377	0		142.87	0
143.381	0		142.874	0
143.384	0		142.878	0
143.388	0		142.881	0
143.392	0		142.885	2
143.396	0		142.889	0
143.4	0		142.893	0
143.404	0		142.897	0
143.408	0		142.901	0
143.412	0		142.905	0
143.416	0		142.909	0
143.42	0		142.913	0
143.424	0		142.917	0
143.428	0		142.921	0
143.432	0		142.924	0
143.436	0		142.928	0
143.44	0		142.932	0
143.444	0		142.936	0
143.448	0		142.94	0
143.452	0		142.944	0
143.456	0		142.948	0
143.46	0		142.952	0
143.464	0		142.956	0
143.468	0		142.96	0
143.472	0		142.963	0
143.476	0		142.967	0
143.48	0		142.971	0
143.484	0		142.975	0
143.488	0		142.979	0
143.492	0		142.983	0
143.496	0		142.987	0
143.5	0		142.991	0
143.504	0		142.995	0
143.508	0		142.999	0
143.512	0		143.002	0
143.516	0		143.006	1
143.52	0		143.01	0
143.524	0		143.014	0
143.528	0		143.018	1
143.531	0		143.022	1
143.535	0		143.026	1
143.539	0		143.03	2.00001
143.543	0		143.034	3.00001
143.547	0		143.038	8.0001
143.551	0		143.042	8.00018
143.555	0		143.045	7.00017
143.559	0		143.049	9.00019
143.563	0		143.053	12.0003
143.567	0		143.057	20.0008
143.571	0		143.061	7.00032
143.575	0		143.065	9.00019
143.579	0		143.069	11.0003
143.583	0		143.073	20.0007
143.587	0		143.077	18.0009
143.591	0		143.081	19.0009
143.595	0		143.084	20.0011
143.599	0		143.088	16.0009
143.603	0		143.092	18.0009
143.607	0		143.096	15.0007
143.611	0		143.1	14.0005
143.615	0		143.104	18.0008
143.619	0		143.108	23.0012
143.623	0		143.112	15.0007
143.627	0		143.116	14.0006
143.631	0		143.12	26.0013
143.635	0		143.124	18.0012
143.639	0		143.127	20.001
143.643	0		143.131	16.0007
143.647	0		143.135	13.0005
143.651	0		143.139	17.0007
143.655	0		143.143	19.0009
143.659	0		143.147	17.0008
143.663	1		143.151	15.0007
143.667	0		143.155	14.0006
143.671	0		143.159	13.0004
143.675	0		143.163	14.0005
143.679	1		143.167	7.00021
143.683	0		143.17	12.0003
143.687	0		143.174	14.0005
143.691	0		143.178	10.0003
143.694	0		143.182	9.00026
143.698	0		143.186	15.0005
143.702	0		143.19	13.0005
143.706	0		143.194	16.0006
143.71	0		143.198	9.00031
143.714	0		143.202	10.0002
143.718	0		143.206	7.00019
143.722	0		143.209	11.0003
143.726	0		143.213	9.00025
143.73	0		143.217	11.0003
143.734	0		143.221	9.00026
143.738	0		143.225	7.00015
143.742	0		143.229	11.0003
143.746	1		143.233	7.00018
143.75	0		143.237	10.0002
143.754	0		143.241	5.00008
143.758	0		143.245	11.0002
143.762	0		143.249	4.00009
143.766	0		143.252	3.00003
143.77	0		143.256	6.00006
143.774	0		143.26	5.00008
143.778	0		143.264	2.00001
143.782	1		143.268	2.00001
143.786	0		143.272	4.00003
143.79	0		143.276	7.0001
143.794	0		143.28	8.00016
143.798	0		143.284	2.00004
143.802	1		143.288	2.00002
143.806	0		143.292	4.00002
143.81	0		143.295	4.00004
143.814	1		143.299	1.00001
143.818	0		143.303	6.00004
143.822	0		143.307	4.00005
143.826	0		143.311	3.00004
143.83	9.00008		143.315	4.00003
143.834	6.00012		143.319	2.00002
143.838	6.00009		143.323	2.00001
143.842	9.00019		143.327	0
143.846	8.00019		143.331	2.00001
143.85	14.0004		143.335	1.00001
143.854	12.0004		143.338	1
143.858	17.0007		143.342	3.00002
143.862	22.0011		143.346	0
143.866	29.002		143.35	1
143.869	20.0013		143.354	1
143.873	26.0015		143.358	2.00001
143.877	29.0022		143.362	2.00001
143.881	25.0018		143.366	1
143.885	30.0022		143.37	1
143.889	30.0024		143.374	1
143.893	11.0007		143.378	2.00001
143.897	20.0008		143.381	1.00001
143.901	32.002		143.385	2
143.905	22.0018		143.389	1.00001
143.909	17.0011		143.393	0
143.913	19.0008		143.397	0
143.917	20.0011		143.401	0
143.921	11.0005		143.405	1
143.925	13.0004		143.409	2
143.929	14.0005		143.413	1.00001
143.933	11.0004		143.417	0
143.937	17.0006		143.421	0
143.941	13.0005		143.424	1
143.945	5.00016		143.428	0
143.949	3.00006		143.432	0
143.953	7.00007		143.436	1
143.957	7.00013		143.44	0
143.961	6.00012		143.444	0
143.965	3.00004		143.448	0
143.969	3.00002		143.452	0
143.973	6.00007		143.456	1
143.977	5.00007		143.46	0
143.981	3.00005		143.464	0
143.985	2.00001		143.467	0
143.989	6.00006		143.471	4.00002
143.993	5.00007		143.475	0
143.997	6.00007		143.479	1
144.001	4.00007		143.483	0
144.005	1.00001		143.487	1
144.009	5.00004		143.491	1
144.013	4.00004		143.495	0
144.017	3.00003		143.499	0
144.021	2.00002		143.503	0
144.025	2.00001		143.507	1
144.029	1		143.51	0
144.033	2.00001		143.514	0
144.037	2.00001		143.518	1
144.041	1.00001		143.522	0
144.045	0		143.526	0
144.049	1		143.53	1
144.053	1		143.534	0
144.057	1		143.538	1
144.061	2		143.542	1
144.065	0		143.546	0
144.069	3.00001		143.55	0
144.072	0		143.554	0
144.076	0		143.557	0
144.08	0		143.561	0
144.084	0		143.565	1
144.088	3.00001		143.569	0
144.092	1.00001		143.573	0
144.096	0		143.577	0
144.1	0		143.581	0
144.104	1		143.585	0
144.108	0		143.589	0
144.112	0		143.593	0
144.116	0		143.597	0
144.12	0		143.6	1
144.124	0		143.604	1
144.128	0		143.608	0
144.132	0		143.612	0
144.136	0		143.616	0
144.14	0		143.62	0
144.144	0		143.624	0
144.148	0		143.628	0
144.152	0		143.632	0
144.156	0		143.636	0
144.16	1		143.64	0
144.164	0		143.643	1
144.168	0		143.647	0
144.172	0		143.651	0
144.176	0		143.655	0
144.18	0		143.659	0
144.184	0		143.663	0
144.188	1		143.667	0
144.192	0		143.671	0
144.196	0		143.675	0
144.2	0		143.679	0
144.204	1		143.683	0
144.208	0		143.687	0
144.212	0		143.69	0
144.216	0		143.694	0
144.22	0		143.698	0
144.224	0		143.702	0
144.228	0		143.706	0
144.232	0		143.71	0
144.236	0		143.714	0
144.24	0		143.718	0
144.244	0		143.722	0
144.248	0		143.726	0
144.252	0		143.73	0
144.256	0		143.734	0
144.26	0		143.737	0
144.264	0		143.741	0
144.268	0		143.745	0
144.272	0		143.749	0
144.276	0		143.753	0
144.28	0		143.757	0
144.284	0		143.761	0
144.288	0		143.765	0
144.292	0		143.769	0
144.296	0		143.773	0
144.3	1		143.777	0
144.304	0		143.78	0
144.307	0		143.784	0
144.311	0		143.788	0
144.315	0		143.792	0
144.319	0		143.796	0
144.323	0		143.8	0
144.327	0		143.804	0
144.331	0		143.808	0
144.335	0		143.812	0
144.339	0		143.816	0
144.343	0		143.82	0
144.347	0		143.824	0
144.351	0		143.827	0
144.355	0		143.831	0
144.359	0		143.835	0
144.363	0		143.839	1
144.367	0		143.843	0
144.371	0		143.847	0
144.375	0		143.851	0
144.379	0		143.855	0
144.383	0		143.859	0
144.387	0		143.863	0
144.391	0		143.867	0
144.395	0		143.871	0
144.399	0		143.874	0
144.403	0		143.878	0
144.407	0		143.882	0
144.411	0		143.886	0
144.415	0		143.89	0
144.419	0		143.894	0
144.423	0		143.898	0
144.427	0		143.902	0
144.431	0		143.906	0
144.435	0		143.91	0
144.439	0		143.914	0
144.443	0		143.918	0
144.447	0		143.921	0
144.451	0		143.925	0
144.455	0		143.929	0
144.459	0		143.933	0
144.463	0		143.937	0
144.467	0		143.941	0
144.471	0		143.945	0
144.475	0		143.949	0
144.479	0		143.953	1
144.483	0		143.957	0
144.487	0		143.961	0
144.491	0		143.965	0
144.495	0		143.968	0
144.499	0		143.972	0
144.503	0		143.976	0
144.507	0		143.98	0
144.511	0		143.984	1
144.515	0		143.988	2.00001
144.519	0		143.992	0
144.523	0		143.996	1
144.527	0		144	0
144.531	0		144.004	2.00001
144.535	0		144.008	4.00003
144.539	0		144.012	5.00004
144.543	0		144.015	4.00006
144.547	0		144.019	15.0004
144.551	0		144.023	17.0007
144.555	0		144.027	10.0004
144.559	0		144.031	6.00013
144.563	0		144.035	22.0007
144.567	0		144.039	19.0011
144.571	0		144.043	23.0012
144.575	0		144.047	30.0021
144.579	0		144.051	22.0016
144.583	0		144.055	25.0017
144.587	0		144.059	32.0023
144.591	0		144.062	26.0021
144.595	0		144.066	25.0017
144.599	0		144.07	31.0021
144.603	0		144.074	29.0025
144.607	0		144.078	28.0021
144.611	0		144.082	25.0018
144.614	0		144.086	36.0027
144.618	0		144.09	38.0037
144.622	0		144.094	30.0029
144.626	1		144.098	31.0025
144.63	0		144.102	34.003
144.634	0		144.106	30.0026
144.638	0		144.11	27.002
144.642	0		144.113	24.0017
144.646	0		144.117	27.0019
144.65	0		144.121	25.0017
144.654	0		144.125	25.0018
144.658	0		144.129	23.0016
144.662	0		144.133	19.001
144.666	0		144.137	33.0021
144.67	0		144.141	20.0015
144.674	0		144.145	15.0007
144.678	0		144.149	18.0009
144.682	0		144.153	22.0011
144.686	0		144.157	21.0013
144.69	0		144.16	17.0008
144.694	0		144.164	26.0014
144.698	0		144.168	22.0015
144.702	0		144.172	24.0015
144.706	0		144.176	19.0011
144.71	0		144.18	15.0007
144.714	0		144.184	11.0004
144.718	0		144.188	10.0003
144.722	0		144.192	8.00019
144.726	0		144.196	10.0003
144.73	0		144.2	8.0002
144.734	0		144.204	8.00017
144.738	0		144.208	10.0002
144.742	0		144.211	9.00025
144.746	0		144.215	11.0003
144.75	0		144.219	14.0004
144.754	0		144.223	13.0005
144.758	0		144.227	4.0001
144.762	0		144.231	10.0002
144.766	0		144.235	11.0003
144.77	0		144.239	9.00025
144.774	0		144.243	10.0003
144.778	0		144.247	7.00015
144.782	0		144.251	9.00021
144.786	0		144.255	6.00012
144.79	0		144.258	12.0003
144.794	0		144.262	6.00016
144.798	0		144.266	2.00003
144.802	0		144.27	4.00003
144.806	0		144.274	6.00007
144.81	0		144.278	2.00003
144.814	0		144.282	3.00003
144.818	0		144.286	3.00001
144.822	0		144.29	4.00004
144.826	0		144.294	12.0002
144.83	0		144.298	6.00014
144.834	2		144.302	4.00006
144.838	1		144.306	5.00007
144.842	2.00001		144.309	3.00003
144.846	2.00001		144.313	0
144.85	2.00001		144.317	5.00003
144.854	5.00005		144.321	6.00006
144.858	6.00006		144.325	2.00003
144.862	3.00004		144.329	6.00005
144.866	12.0002		144.333	3.00004
144.87	9.00024		144.337	2.00002
144.874	7.00016		144.341	0
144.878	9.00021		144.345	0
144.882	11.0003		144.349	3.00001
144.886	13.0004		144.353	4.00004
144.89	10.0003		144.357	0
144.894	4.00008		144.36	1
144.898	6.00009		144.364	1
144.902	4.00005		144.368	2.00001
144.906	8.00012		144.372	2.00001
144.91	3.00006		144.376	2.00001
144.914	4.00004		144.38	2.00001
144.918	10.0002		144.384	3.00002
144.922	11.0003		144.388	2.00001
144.926	7.00018		144.392	0
144.93	7.00015		144.396	1
144.934	5.00008		144.4	2.00001
144.938	7.0001		144.404	0
144.942	3.00005		144.408	1
144.946	2.00001		144.411	1
144.95	5.00004		144.415	0
144.954	2.00003		144.419	3.00001
144.958	4.00002		144.423	1.00001
144.962	3.00003		144.427	1
144.966	1.00001		144.431	1
144.97	2.00001		144.435	2.00001
144.974	4.00003		144.439	1.00001
144.978	2.00002		144.443	0
144.982	1.00001		144.447	0
144.986	1		144.451	0
144.99	2.00001		144.455	0
144.994	2.00001		144.459	1
144.998	1.00001		144.462	0
145.002	1		144.466	1
145.006	0		144.47	0
145.01	1		144.474	2
145.014	0		144.478	2.00001
145.018	0		144.482	1.00001
145.022	0		144.486	0
145.026	2		144.49	0
145.03	1.00001		144.494	1
145.034	0		144.498	0
145.038	1		144.502	0
145.042	0		144.506	0
145.046	1		144.51	0
145.05	1		144.513	0
145.054	0		144.517	1
145.058	0		144.521	0
145.062	1		144.525	1
145.066	1		144.529	2
145.07	0		144.533	0
145.074	0		144.537	0
145.078	1		144.541	0
145.082	0		144.545	0
145.086	0		144.549	0
145.09	0		144.553	0
145.094	1		144.557	1
145.098	1		144.561	1
145.102	0		144.564	1
145.106	0		144.568	0
145.11	0		144.572	0
145.114	0		144.576	0
145.118	0		144.58	0
145.122	0		144.584	0
145.126	0		144.588	0
145.13	0		144.592	0
145.134	0		144.596	0
145.138	0		144.6	0
145.142	0		144.604	0
145.146	0		144.608	0
145.15	0		144.612	0
145.154	0		144.616	0
145.158	0		144.619	0
145.162	0		144.623	0
145.166	0		144.627	0
145.17	0		144.631	0
145.174	0		144.635	0
145.178	0		144.639	0
145.181	0		144.643	0
145.185	0		144.647	0
145.189	0		144.651	0
145.193	0		144.655	0
145.197	0		144.659	0
145.201	0		144.663	0
145.205	0		144.667	0
145.209	0		144.671	0
145.213	0		144.674	0
145.217	0		144.678	0
145.221	0		144.682	0
145.225	0		144.686	0
145.229	0		144.69	0
145.233	0		144.694	1
145.237	0		144.698	0
145.241	0		144.702	0
145.245	0		144.706	0
145.249	0		144.71	0
145.253	0		144.714	0
145.257	0		144.718	0
145.261	0		144.722	0
145.265	1		144.725	0
145.269	0		144.729	0
145.273	0		144.733	0
145.277	0		144.737	0
145.281	0		144.741	0
145.285	0		144.745	0
145.289	1		144.749	0
145.293	0		144.753	0
145.297	0		144.757	0
145.301	0		144.761	0
145.305	0		144.765	0
145.309	0		144.769	0
145.313	0		144.773	0
145.317	0		144.777	0
145.321	0		144.78	0
145.325	0		144.784	0
145.329	0		144.788	0
145.333	0		144.792	0
145.337	0		144.796	0
145.341	0		144.8	0
145.345	0		144.804	0
145.349	0		144.808	1
145.353	0		144.812	0
145.357	1		144.816	0
145.361	0		144.82	0
145.365	0		144.824	0
145.369	0		144.828	0
145.373	0		144.832	0
145.377	0		144.835	0
145.381	0		144.839	0
145.385	0		144.843	0
145.389	0		144.847	0
145.393	0		144.851	0
145.397	0		144.855	0
145.401	0		144.859	0
145.405	0		144.863	0
145.409	0		144.867	0
145.413	0		144.871	0
145.417	0		144.875	0
145.421	0		144.879	0
145.425	0		144.883	0
145.429	0		144.887	0
145.433	0		144.89	0
145.437	0		144.894	0
145.441	0		144.898	1
145.445	0		144.902	0
145.449	0		144.906	0
145.453	0		144.91	0
145.457	0		144.914	0
145.461	0		144.918	0
145.465	0		144.922	0
145.469	0		144.926	0
145.473	0		144.93	0
145.477	0		144.934	0
145.481	1		144.938	0
145.485	0		144.942	0
145.489	0		144.946	1
145.493	0		144.949	0
145.497	0		144.953	0
145.501	0		144.957	0
145.505	0		144.961	0
145.509	0		144.965	0
145.513	0		144.969	0
145.517	0		144.973	0
145.521	0		144.977	0
145.525	0		144.981	0
145.529	0		144.985	0
145.533	0		144.989	0
145.537	0		144.993	1
145.541	0		144.997	1
145.545	0		145.001	2.00001
145.549	0		145.004	4.00002
145.553	0		145.008	2.00002
145.557	0		145.012	4.00003
145.561	0		145.016	5.00007
145.565	0		145.02	6.0001
145.569	0		145.024	6.00008
145.573	0		145.028	8.00017
145.577	0		145.032	8.00016
145.581	0		145.036	9.00019
145.585	0		145.04	11.0003
145.589	0		145.044	5.00014
145.593	0		145.048	13.0003
145.597	0		145.052	16.0006
145.601	0		145.056	9.0003
145.605	0		145.06	13.0004
145.609	0		145.063	16.0006
145.613	0		145.067	22.0011
145.617	0		145.071	17.0009
145.621	0		145.075	12.0005
145.625	0		145.079	12.0004
145.629	0		145.083	19.0008
145.633	0		145.087	17.0009
145.638	0		145.091	14.0006
145.642	0		145.095	9.00032
145.646	0		145.099	10.0003
145.65	0		145.103	16.0004
145.654	0		145.107	18.0008
145.658	0		145.111	10.0005
145.662	0		145.115	7.00024
145.666	0		145.119	8.00016
145.67	0		145.122	9.0002
145.674	0		145.126	9.0002
145.678	0		145.13	11.0003
145.682	0		145.134	15.0005
145.686	0		145.138	4.00012
145.69	0		145.142	9.00015
145.694	0		145.146	6.00012
145.698	0		145.15	9.00016
145.702	0		145.154	9.00025
145.706	0		145.158	6.00013
145.71	0		145.162	5.00006
145.714	0		145.166	9.00017
145.718	0		145.17	5.0001
145.722	1		145.174	9.00017
145.726	0		145.178	6.00013
145.73	0		145.181	6.0001
145.734	0		145.185	4.00006
145.738	0		145.189	3.00003
145.742	0		145.193	7.00009
145.746	0		145.197	4.00006
145.75	1		145.201	3.00002
145.754	0		145.205	6.00008
145.758	0		145.209	3.00003
145.762	0		145.213	3.00003
145.766	0		145.217	3.00003
145.77	0		145.221	3.00002
145.774	0		145.225	4.00004
145.778	0		145.229	4.00004
145.782	0		145.233	6.00008
145.786	0		145.237	4.00005
145.79	0		145.24	1.00001
145.794	0		145.244	5.00004
145.798	0		145.248	2.00003
145.802	0		145.252	4.00003
145.806	0		145.256	7.00009
145.81	0		145.26	5.00009
145.814	0		145.264	9.00015
145.818	0		145.268	1.00002
145.822	0		145.272	2.00001
145.826	0		145.276	0
145.83	1		145.28	3.00001
145.834	0		145.284	0
145.838	2		145.288	1
145.842	9.00012		145.292	4.00002
145.846	2.00004		145.296	2.00001
145.85	5.00005		145.299	2.00001
145.854	4.00005		145.303	1
145.858	9.00013		145.307	1
145.862	21.0008		145.311	2.00001
145.866	16.0007		145.315	4.00003
145.87	7.00023		145.319	0
145.874	18.0006		145.323	1
145.878	14.0006		145.327	4.00002
145.882	14.0006		145.331	0
145.886	20.0009		145.335	1
145.89	18.0009		145.339	2.00001
145.894	12.0005		145.343	1.00001
145.898	16.0005		145.347	0
145.902	27.0014		145.351	1
145.906	14.0009		145.355	1
145.91	12.0005		145.359	0
145.914	12.0003		145.362	2
145.918	22.001		145.366	1
145.922	15.0007		145.37	1
145.926	17.0008		145.374	1
145.93	11.0004		145.378	1
145.934	7.00021		145.382	0
145.938	14.0004		145.386	0
145.942	7.00021		145.39	1
145.946	4.00005		145.394	1
145.95	6.00008		145.398	0
145.954	7.00013		145.402	0
145.958	11.0002		145.406	0
145.962	3.00006		145.41	0
145.966	3.00004		145.414	0
145.97	1.00001		145.418	0
145.974	8.00008		145.422	0
145.978	1.00001		145.425	0
145.982	4.00002		145.429	0
145.986	6.00009		145.433	0
145.99	4.00005		145.437	0
145.994	2.00002		145.441	1
145.998	1.00001		145.445	0
146.002	3.00001		145.449	0
146.006	2.00001		145.453	0
146.01	0		145.457	0
146.014	2		145.461	0
146.018	4.00003		145.465	0
146.022	2.00002		145.469	0
146.026	0		145.473	0
146.03	3.00001		145.477	0
146.034	0		145.481	0
146.038	0		145.485	0
146.042	0		145.488	2
146.046	1		145.492	0
146.05	1		145.496	0
146.054	1		145.5	0
146.058	0		145.504	0
146.062	0		145.508	0
146.066	1		145.512	0
146.07	1		145.516	0
146.074	0		145.52	0
146.078	0		145.524	0
146.082	0		145.528	0
146.086	0		145.532	0
146.09	0		145.536	0
146.094	0		145.54	0
146.098	2		145.544	0
146.102	0		145.548	0
146.106	1		145.551	0
146.11	0		145.555	1
146.114	0		145.559	0
146.118	0		145.563	0
146.122	0		145.567	0
146.126	0		145.571	0
146.13	0		145.575	0
146.134	0		145.579	0
146.138	0		145.583	0
146.142	0		145.587	1
146.146	0		145.591	0
146.15	0		145.595	0
146.154	0		145.599	0
146.158	0		145.603	0
146.162	0		145.607	0
146.166	0		145.611	0
146.17	0		145.614	0
146.174	0		145.618	0
146.178	0		145.622	0
146.182	0		145.626	0
146.186	0		145.63	0
146.19	0		145.634	0
146.194	0		145.638	0
146.198	0		145.642	1
146.202	0		145.646	0
146.207	2		145.65	0
146.211	0		145.654	0
146.215	0		145.658	1
146.219	0		145.662	1
146.223	0		145.666	0
146.227	0		145.67	0
146.231	0		145.674	0
146.235	1		145.678	0
146.239	0		145.681	0
146.243	0		145.685	0
146.247	0		145.689	0
146.251	0		145.693	0
146.255	0		145.697	0
146.259	0		145.701	0
146.263	0		145.705	0
146.267	0		145.709	0
146.271	1		145.713	0
146.275	0		145.717	0
146.279	0		145.721	0
146.283	0		145.725	0
146.287	0		145.729	0
146.291	0		145.733	0
146.295	0		145.737	0
146.299	0		145.741	0
146.303	0		145.745	0
146.307	0		145.748	0
146.311	0		145.752	0
146.315	0		145.756	0
146.319	0		145.76	0
146.323	0		145.764	0
146.327	0		145.768	0
146.331	0		145.772	0
146.335	0		145.776	0
146.339	0		145.78	0
146.343	0		145.784	0
146.347	0		145.788	0
146.351	0		145.792	0
146.355	0		145.796	0
146.359	0		145.8	0
146.363	0		145.804	0
146.367	0		145.808	0
146.371	0		145.812	0
146.375	0		145.815	0
146.379	0		145.819	0
146.383	0		145.823	0
146.387	0		145.827	0
146.391	0		145.831	0
146.395	0		145.835	0
146.399	0		145.839	0
146.403	0		145.843	0
146.407	0		145.847	0
146.411	0		145.851	0
146.415	0		145.855	0
146.419	0		145.859	0
146.423	0		145.863	0
146.427	0		145.867	0
146.431	0		145.871	0
146.435	0		145.875	0
146.439	0		145.879	0
146.443	0		145.883	1
146.447	0		145.886	0
146.451	1		145.89	0
146.455	0		145.894	0
146.459	0		145.898	0
146.463	0		145.902	0
146.467	0		145.906	0
146.471	0		145.91	0
146.475	0		145.914	0
146.479	0		145.918	0
146.483	0		145.922	0
146.487	0		145.926	0
146.491	0		145.93	0
146.495	0		145.934	0
146.499	0		145.938	0
146.503	0		145.942	0
146.507	0		145.946	0
146.511	0		145.95	0
146.516	0		145.953	0
146.52	0		145.957	1
146.524	0		145.961	0
146.528	0		145.965	0
146.532	0		145.969	0
146.536	0		145.973	1
146.54	0		145.977	1
146.544	0		145.981	1.00001
146.548	0		145.985	4.00002
146.552	0		145.989	4.00004
146.556	0		145.993	2.00002
146.56	0		145.997	9.00012
146.564	0		146.001	6.00013
146.568	0		146.005	11.0002
146.572	0		146.009	18.0006
146.576	0		146.013	14.0007
146.58	0		146.017	13.0005
146.584	0		146.021	12.0004
146.588	0		146.025	18.0007
146.592	0		146.028	20.001
146.596	0		146.032	19.001
146.6	0		146.036	27.0016
146.604	0		146.04	17.001
146.608	0		146.044	21.0011
146.612	1		146.048	21.0012
146.616	0		146.052	35.0025
146.62	0		146.056	25.0021
146.624	0		146.06	16.0008
146.628	0		146.064	19.0009
146.632	0		146.068	25.0015
146.636	0		146.072	20.0011
146.64	0		146.076	20.0012
146.644	0		146.08	16.0009
146.648	0		146.084	16.0007
146.652	0		146.088	18.0008
146.656	0		146.092	32.0021
146.66	0		146.096	17.0011
146.664	0		146.099	22.0011
146.668	0		146.103	29.0019
146.672	0		146.107	27.0019
146.676	0		146.111	19.0014
146.68	0		146.115	19.001
146.684	0		146.119	18.0008
146.688	0		146.123	17.0008
146.692	0		146.127	14.0006
146.696	0		146.131	14.0006
146.7	0		146.135	19.0009
146.704	0		146.139	16.0007
146.708	0		146.143	11.0004
146.712	0		146.147	13.0004
146.716	0		146.151	7.00022
146.72	0		146.155	14.0003
146.724	0		146.159	9.00029
146.728	0		146.163	14.0004
146.732	0		146.167	6.00018
146.736	0		146.171	6.0001
146.74	0		146.174	4.00005
146.744	0		146.178	9.00015
146.748	0		146.182	13.0004
146.753	0		146.186	16.0006
146.757	0		146.19	5.00013
146.761	0		146.194	4.00006
146.765	0		146.198	5.00007
146.769	0		146.202	3.00004
146.773	0		146.206	4.00003
146.777	0		146.21	6.00007
146.781	0		146.214	5.00008
146.785	0		146.218	10.0002
146.789	0		146.222	5.00013
146.793	0		146.226	2.00001
146.797	0		146.23	5.00005
146.801	0		146.234	6.00009
146.805	0		146.238	5.00008
146.809	0		146.242	6.00008
146.813	0		146.246	5.00007
146.817	0		146.249	2.00002
146.821	0		146.253	4.00004
146.825	0		146.257	2.00002
146.829	0		146.261	1.00001
146.833	1		146.265	2.00001
146.837	0		146.269	4.00003
146.841	0		146.273	5.00005
146.845	0		146.277	2.00002
146.849	0		146.281	5.00005
146.853	0		146.285	1.00001
146.857	0		146.289	3.00002
146.861	0		146.293	0
146.865	0		146.297	2
146.869	0		146.301	5.00005
146.873	0		146.305	1.00001
146.877	0		146.309	2.00001
146.881	0		146.313	2
146.885	0		146.317	1.00001
146.889	0		146.321	4.00003
146.893	0		146.324	1.00001
146.897	0		146.328	0
146.901	0		146.332	0
146.905	0		146.336	0
146.909	0		146.34	3.00001
146.913	0		146.344	1.00001
146.917	0		146.348	2.00001
146.921	0		146.352	0
146.925	0		146.356	0
146.929	0		146.36	2
146.933	0		146.364	0
146.937	0		146.368	1
146.941	0		146.372	1
146.945	0		146.376	2.00001
146.949	0		146.38	0
146.954	0		146.384	1
146.958	0		146.388	3.00002
146.962	0		146.392	1.00001
146.966	0		146.396	1
146.97	0		146.4	2.00001
146.974	0		146.403	0
146.978	0		146.407	0
146.982	0		146.411	1
146.986	0		146.415	0
146.99	0		146.419	1
146.994	0		146.423	2.00001
146.998	0		146.427	1.00001
147.002	0		146.431	0
147.006	0		146.435	0
147.01	0		146.439	2
147.014	0		146.443	0
147.018	0		146.447	0
147.022	0		146.451	0
147.026	0		146.455	0
147.03	0		146.459	0
147.034	0		146.463	0
147.038	0		146.467	1
147.042	0		146.471	0
147.046	0		146.475	0
147.05	0		146.479	0
147.054	0		146.483	0
147.058	0		146.486	0
147.062	0		146.49	0
147.066	0		146.494	0
147.07	0		146.498	0
147.074	0		146.502	0
147.078	0		146.506	0
147.082	0		146.51	0
147.086	0		146.514	1
147.09	0		146.518	0
147.094	0		146.522	0
147.098	0		146.526	0
147.102	0		146.53	0
147.106	0		146.534	0
147.11	0		146.538	0
147.114	0		146.542	0
147.118	0		146.546	0
147.122	0		146.55	0
147.126	0		146.554	0
147.13	0		146.558	0
147.135	0		146.562	0
147.139	0		146.565	0
147.143	0		146.569	0
147.147	0		146.573	0
147.151	0		146.577	0
147.155	0		146.581	0
147.159	0		146.585	0
147.163	0		146.589	0
147.167	0		146.593	1
147.171	0		146.597	0
147.175	0		146.601	0
147.179	0		146.605	0
147.183	0		146.609	0
147.187	0		146.613	0
147.191	0		146.617	1
147.195	0		146.621	0
147.199	0		146.625	0
147.203	0		146.629	0
147.207	0		146.633	0
147.211	0		146.637	0
147.215	0		146.641	0
147.219	0		146.645	0
147.223	0		146.649	0
147.227	0		146.652	0
147.231	0		146.656	0
147.235	0		146.66	0
147.239	0		146.664	1
147.243	0		146.668	0
147.247	0		146.672	0
147.251	0		146.676	0
147.255	0		146.68	0
147.259	0		146.684	0
147.263	0		146.688	0
147.267	0		146.692	0
147.271	0		146.696	0
147.275	0		146.7	0
147.279	0		146.704	0
147.283	0		146.708	0
147.287	0		146.712	0
147.291	0		146.716	0
147.296	0		146.72	0
147.3	0		146.724	0
147.304	0		146.728	0
147.308	0		146.732	0
147.312	0		146.736	0
147.316	0		146.739	0
147.32	0		146.743	0
147.324	0		146.747	0
147.328	0		146.751	0
147.332	0		146.755	0
147.336	0		146.759	0
147.34	0		146.763	0
147.344	0		146.767	0
147.348	0		146.771	0
147.352	0		146.775	0
147.356	0		146.779	0
147.36	0		146.783	0
147.364	0		146.787	0
147.368	0		146.791	0
147.372	0		146.795	0
147.376	0		146.799	0
147.38	0		146.803	0
147.384	0		146.807	0
147.388	0		146.811	0
147.392	0		146.815	0
147.396	0		146.819	0
147.4	0		146.823	0
147.404	0		146.826	0
147.408	0		146.83	0
147.412	0		146.834	0
147.416	0		146.838	0
147.42	0		146.842	0
147.424	0		146.846	0
147.428	0		146.85	0
147.432	0		146.854	0
147.436	0		146.858	0
147.44	0		146.862	0
147.444	0		146.866	0
147.449	0		146.87	0
147.453	0		146.874	0
147.457	0		146.878	0
147.461	0		146.882	0
147.465	0		146.886	0
147.469	0		146.89	0
147.473	0		146.894	0
147.477	0		146.898	0
147.481	0		146.902	0
147.485	0		146.906	0
147.489	0		146.91	0
147.493	0		146.914	0
147.497	0		146.917	0
147.501	0		146.921	0
147.505	0		146.925	0
147.509	0		146.929	0
147.513	0		146.933	0
147.517	1		146.937	0
147.521	0		146.941	0
147.525	0		146.945	0
147.529	0		146.949	0
147.533	0		146.953	0
147.537	0		146.957	0
147.541	0		146.961	0
147.545	0		146.965	0
147.549	0		146.969	0
147.553	0		146.973	0
147.557	0		146.977	0
147.561	0		146.981	0
147.565	0		146.985	0
147.569	0		146.989	0
147.573	0		146.993	0
147.577	0		146.997	0
147.581	0		147.001	0
147.586	0		147.005	0
147.59	0		147.009	0
147.594	0		147.012	0
147.598	0		147.016	0
147.602	0		147.02	0
147.606	0		147.024	0
147.61	0		147.028	0
147.614	0		147.032	0
147.618	0		147.036	0
147.622	0		147.04	0
147.626	0		147.044	0
147.63	0		147.048	0
147.634	0		147.052	0
147.638	0		147.056	0
147.642	0		147.06	0
147.646	0		147.064	0
147.65	0		147.068	0
147.654	0		147.072	0
147.658	0		147.076	0
147.662	0		147.08	0
147.666	0		147.084	0
147.67	0		147.088	0
147.674	0		147.092	0
147.678	0		147.096	0
147.682	0		147.1	0
147.686	0		147.104	0
147.69	0		147.107	0
147.694	0		147.111	0
147.698	0		147.115	0
147.702	0		147.119	0
147.706	0		147.123	0
147.71	0		147.127	0
147.714	0		147.131	0
147.719	0		147.135	0
147.723	0		147.139	0
147.727	0		147.143	0
147.731	0		147.147	0
147.735	0		147.151	0
147.739	0		147.155	0
147.743	0		147.159	0
147.747	0		147.163	0
147.751	0		147.167	0
147.755	0		147.171	0
147.759	0		147.175	0
147.763	0		147.179	0
147.767	0		147.183	0
147.771	0		147.187	0
147.775	0		147.191	0
147.779	0		147.195	0
147.783	0		147.199	0
147.787	0		147.203	0
147.791	0		147.207	0
147.795	0		147.21	0
147.799	0		147.214	0
147.803	0		147.218	0
147.807	0		147.222	0
147.811	0		147.226	0
147.815	0		147.23	0
147.819	0		147.234	0
147.823	1		147.238	0
147.827	0		147.242	0
147.831	0		147.246	0
147.835	0		147.25	0
147.839	0		147.254	0
147.844	0		147.258	0
147.848	0		147.262	0
147.852	1		147.266	0
147.856	2.00001		147.27	0
147.86	5.00004		147.274	0
147.864	2.00002		147.278	0
147.868	3.00002		147.282	0
147.872	6.00007		147.286	0
147.876	5.00008		147.29	0
147.88	9.00016		147.294	0
147.884	5.0001		147.298	0
147.888	3.00004		147.302	0
147.892	8.0001		147.306	0
147.896	5.00008		147.31	0
147.9	11.0002		147.313	0
147.904	7.0002		147.317	0
147.908	8.00015		147.321	0
147.912	9.00022		147.325	0
147.916	2.00004		147.329	0
147.92	6.00007		147.333	0
147.924	5.00006		147.337	0
147.928	5.00007		147.341	0
147.932	6.0001		147.345	0
147.936	0		147.349	0
147.94	5.00003		147.353	0
147.944	4.00004		147.357	1
147.948	1.00001		147.361	0
147.952	3.00002		147.365	0
147.956	1		147.369	0
147.961	2.00001		147.373	0
147.965	2.00001		147.377	0
147.969	3.00002		147.381	0
147.973	1.00001		147.385	0
147.977	3.00002		147.389	0
147.981	4.00004		147.393	0
147.985	1.00001		147.397	0
147.989	2.00001		147.401	0
147.993	0		147.405	0
147.997	2		147.409	0
148.001	1.00001		147.413	0
148.005	2.00001		147.417	0
148.009	0		147.42	0
148.013	2.00001		147.424	0
148.017	0		147.428	0
148.021	0		147.432	0
148.025	1		147.436	0
148.029	0		147.44	0
148.033	0		147.444	0
148.037	2		147.448	0
148.041	0		147.452	0
148.045	1		147.456	0
148.049	0		147.46	0
148.053	0		147.464	0
148.057	0		147.468	1
148.061	2		147.472	0
148.065	0		147.476	0
148.069	0		147.48	0
148.074	3.00001		147.484	0
148.078	0		147.488	0
148.082	1		147.492	0
148.086	0		147.496	0
148.09	0		147.5	0
148.094	0		147.504	0
148.098	0		147.508	0
148.102	0		147.512	0
148.106	0		147.516	0
148.11	1		147.52	0
148.114	0		147.524	0
148.118	2		147.528	0
148.122	0		147.531	0
148.126	0		147.535	0
148.13	0		147.539	0
148.134	0		147.543	0
148.138	0		147.547	0
148.142	0		147.551	0
148.146	0		147.555	0
148.15	0		147.559	0
148.154	0		147.563	0
148.158	0		147.567	0
148.162	0		147.571	0
148.166	1		147.575	0
148.17	0		147.579	0
148.174	0		147.583	0
148.178	0		147.587	1
148.183	0		147.591	0
148.187	0		147.595	0
148.191	0		147.599	0
148.195	0		147.603	0
148.199	0		147.607	0
148.203	0		147.611	0
148.207	0		147.615	0
148.211	0		147.619	0
148.215	0		147.623	0
148.219	0		147.627	0
148.223	0		147.631	0
148.227	0		147.635	0
148.231	0		147.639	0
148.235	0		147.643	0
148.239	0		147.647	0
148.243	0		147.65	0
148.247	0		147.654	0
148.251	0		147.658	0
148.255	0		147.662	0
148.259	0		147.666	0
148.263	0		147.67	0
148.267	0		147.674	0
148.271	0		147.678	0
148.275	0		147.682	0
148.279	0		147.686	0
148.283	0		147.69	0
148.288	0		147.694	0
148.292	0		147.698	0
148.296	0		147.702	0
148.3	0		147.706	0
148.304	0		147.71	0
148.308	0		147.714	0
148.312	0		147.718	0
148.316	0		147.722	0
148.32	0		147.726	0
148.324	0		147.73	0
148.328	0		147.734	0
148.332	0		147.738	0
148.336	0		147.742	0
148.34	0		147.746	0
148.344	0		147.75	0
148.348	0		147.754	0
148.352	0		147.758	0
148.356	0		147.762	0
148.36	0		147.766	0
148.364	0		147.77	0
148.368	0		147.773	0
148.372	0		147.777	0
148.376	0		147.781	1
148.38	0		147.785	0
148.384	0		147.789	0
148.389	0		147.793	0
148.393	0		147.797	0
148.397	0		147.801	0
148.401	0		147.805	0
148.405	0		147.809	0
148.409	0		147.813	0
148.413	0		147.817	0
148.417	0		147.821	0
148.421	0		147.825	0
148.425	0		147.829	0
148.429	0		147.833	0
148.433	0		147.837	0
148.437	0		147.841	0
148.441	0		147.845	1
148.445	0		147.849	0
148.449	0		147.853	0
148.453	0		147.857	0
148.457	0		147.861	0
148.461	0		147.865	0
148.465	0		147.869	0
148.469	0		147.873	0
148.473	0		147.877	0
148.477	0		147.881	0
148.481	0		147.885	0
148.486	0		147.889	0
148.49	0		147.893	0
148.494	0		147.897	0
148.498	1		147.901	0
148.502	0		147.904	0
148.506	0		147.908	0
148.51	0		147.912	0
148.514	0		147.916	0
148.518	0		147.92	0
148.522	0		147.924	0
148.526	0		147.928	0
148.53	0		147.932	0
148.534	0		147.936	0
148.538	0		147.94	0
148.542	0		147.944	0
148.546	0		147.948	0
148.55	0		147.952	0
148.554	0		147.956	0
148.558	0		147.96	1
148.562	0		147.964	0
148.566	0		147.968	2
148.57	0		147.972	3.00001
148.574	0		147.976	1.00001
148.579	0		147.98	3.00002
148.583	0		147.984	2.00001
148.587	0		147.988	1.00001
148.591	0		147.992	8.00008
148.595	0		147.996	6.0001
148.599	0		148	5.00008
148.603	0		148.004	7.00011
148.607	0		148.008	6.0001
148.611	0		148.012	6.00011
148.615	0		148.016	5.00006
148.619	0		148.02	8.00014
148.623	0		148.024	9.0002
148.627	0		148.028	11.0003
148.631	0		148.032	3.00005
148.635	0		148.036	5.00005
148.639	0		148.04	14.0003
148.643	0		148.043	9.00023
148.647	0		148.047	4.00007
148.651	0		148.051	8.00015
148.655	0		148.055	4.00008
148.659	0		148.059	7.00011
148.663	0		148.063	4.00005
148.667	0		148.067	3.00003
148.672	0		148.071	8.00011
148.676	0		148.075	6.00012
148.68	0		148.079	5.00009
148.684	0		148.083	8.00013
148.688	0		148.087	7.00015
148.692	0		148.091	7.00012
148.696	0		148.095	5.00008
148.7	0		148.099	6.00009
148.704	0		148.103	1.00001
148.708	0		148.107	0
148.712	0		148.111	3.00001
148.716	0		148.115	5.00004
148.72	0		148.119	4.00005
148.724	0		148.123	0
148.728	1		148.127	3.00001
148.732	0		148.131	5.00005
148.736	0		148.135	5.00006
148.74	0		148.139	3.00003
148.744	0		148.143	8.00011
148.748	0		148.147	0
148.752	0		148.151	2
148.756	0		148.155	1.00001
148.761	0		148.159	1
148.765	0		148.163	2.00001
148.769	0		148.167	3.00002
148.773	0		148.171	1.00001
148.777	0		148.175	3.00001
148.781	0		148.179	1.00001
148.785	0		148.183	2.00001
148.789	0		148.187	1
148.793	0		148.191	2.00001
148.797	0		148.194	4.00002
148.801	0		148.198	2.00002
148.805	0		148.202	3.00002
148.809	0		148.206	2.00001
148.813	0		148.21	1
148.817	0		148.214	1.00001
148.821	0		148.218	3.00001
148.825	0		148.222	2.00002
148.829	0		148.226	2.00001
148.833	0		148.23	1
148.837	0		148.234	1
148.841	0		148.238	1
148.846	0		148.242	0
148.85	0		148.246	0
148.854	0		148.25	3.00001
148.858	0		148.254	0
148.862	0		148.258	1
148.866	0		148.262	1
148.87	0		148.266	1
148.874	0		148.27	0
148.878	0		148.274	0
148.882	0		148.278	0
148.886	0		148.282	2
148.89	0		148.286	0
148.894	0		148.29	2
148.898	0		148.294	3.00002
148.902	0		148.298	0
148.906	0		148.302	1
148.91	0		148.306	0
148.914	0		148.31	0
148.918	0		148.314	0
148.922	0		148.318	0
148.926	0		148.322	0
148.931	0		148.326	0
148.935	0		148.33	0
148.939	0		148.334	1
148.943	0		148.338	0
148.947	0		148.342	0
148.951	0		148.346	0
148.955	0		148.35	0
148.959	0		148.354	1
148.963	0		148.357	0
148.967	0		148.361	0
148.971	0		148.365	2
148.975	0		148.369	0
148.979	0		148.373	0
148.983	0		148.377	1
148.987	0		148.381	0
148.991	0		148.385	0
148.995	0		148.389	0
148.999	0		148.393	1
149.003	0		148.397	0
149.007	0		148.401	0
149.011	0		148.405	0
149.016	0		148.409	0
149.02	0		148.413	0
149.024	0		148.417	0
149.028	0		148.421	1
149.032	0		148.425	0
149.036	0		148.429	0
149.04	0		148.433	0
149.044	0		148.437	0
149.048	0		148.441	0
149.052	0		148.445	0
149.056	0		148.449	0
149.06	0		148.453	0
149.064	0		148.457	0
149.068	0		148.461	0
149.072	0		148.465	0
149.076	0		148.469	0
149.08	0		148.473	0
149.084	0		148.477	0
149.088	0		148.481	0
149.092	0		148.485	0
149.097	0		148.489	1
149.101	0		148.493	0
149.105	0		148.497	0
149.109	0		148.501	1
149.113	0		148.505	1
149.117	0		148.509	0
149.121	0		148.513	0
149.125	0		148.517	0
149.129	0		148.521	0
149.133	0		148.525	0
149.137	0		148.529	0
149.141	1		148.533	0
149.145	0		148.536	0
149.149	0		148.54	0
149.153	0		148.544	0
149.157	0		148.548	0
149.161	0		148.552	0
149.165	0		148.556	0
149.169	0		148.56	0
149.173	0		148.564	0
149.178	0		148.568	0
149.182	0		148.572	0
149.186	0		148.576	0
149.19	0		148.58	0
149.194	0		148.584	0
149.198	0		148.588	1
149.202	0		148.592	0
149.206	0		148.596	0
149.21	0		148.6	0
149.214	0		148.604	0
149.218	0		148.608	0
149.222	0		148.612	0
149.226	0		148.616	0
149.23	1		148.62	0
149.234	0		148.624	0
149.238	0		148.628	0
149.242	0		148.632	0
149.246	0		148.636	0
149.25	0		148.64	0
149.255	0		148.644	0
149.259	0		148.648	0
149.263	0		148.652	0
149.267	0		148.656	0
149.271	0		148.66	0
149.275	0		148.664	1
149.279	0		148.668	0
149.283	0		148.672	0
149.287	0		148.676	0
149.291	0		148.68	0
149.295	0		148.684	0
149.299	0		148.688	0
149.303	0		148.692	0
149.307	0		148.696	0
149.311	0		148.7	0
149.315	0		148.704	0
149.319	0		148.708	0
149.323	0		148.712	0
149.327	0		148.716	0
149.332	1		148.72	0
149.336	0		148.724	0
149.34	0		148.728	0
149.344	0		148.732	0
149.348	0		148.735	0
149.352	0		148.739	0
149.356	0		148.743	0
149.36	0		148.747	0
149.364	0		148.751	0
149.368	0		148.755	0
149.372	0		148.759	0
149.376	0		148.763	0
149.38	0		148.767	0
149.384	0		148.771	0
149.388	0		148.775	0
149.392	0		148.779	0
149.396	0		148.783	0
149.4	0		148.787	0
149.405	0		148.791	0
149.409	0		148.795	0
149.413	0		148.799	0
149.417	0		148.803	0
149.421	0		148.807	0
149.425	0		148.811	0
149.429	0		148.815	0
149.433	0		148.819	0
149.437	0		148.823	0
149.441	0		148.827	0
149.445	0		148.831	0
149.449	0		148.835	0
149.453	0		148.839	0
149.457	1		148.843	0
149.461	0		148.847	0
149.465	0		148.851	0
149.469	0		148.855	0
149.473	0		148.859	0
149.478	0		148.863	0
149.482	0		148.867	0
149.486	0		148.871	0
149.49	0		148.875	0
149.494	0		148.879	0
149.498	0		148.883	0
149.502	0		148.887	0
149.506	0		148.891	0
149.51	1		148.895	0
149.514	0		148.899	0
149.518	0		148.903	0
149.522	0		148.907	0
149.526	0		148.911	0
149.53	0		148.915	0
149.534	0		148.919	0
149.538	1		148.923	0
149.542	0		148.927	0
149.546	0		148.931	0
149.551	0		148.935	0
149.555	0		148.939	0
149.559	0		148.943	0
149.563	0		148.947	0
149.567	0		148.951	0
149.571	0		148.955	0
149.575	0		148.959	0
149.579	0		148.963	0
149.583	1		148.967	0
149.587	0		148.971	0
149.591	0		148.974	0
149.595	0		148.978	0
149.599	0		148.982	0
149.603	0		148.986	0
149.607	0		148.99	0
149.611	0		148.994	0
149.615	1		148.998	0
149.619	0		149.002	0
149.624	0		149.006	0
149.628	0		149.01	0
149.632	0		149.014	0
149.636	0		149.018	0
149.64	0		149.022	0
149.644	0		149.026	0
149.648	0		149.03	0
149.652	0		149.034	0
149.656	0		149.038	0
149.66	0		149.042	0
149.664	0		149.046	0
149.668	0		149.05	0
149.672	0		149.054	0
149.676	0		149.058	0
149.68	0		149.062	0
149.684	0		149.066	0
149.688	0		149.07	0
149.693	0		149.074	0
149.697	0		149.078	0
[truncated: 7,512 more rows]

## Sheet: fig8
					Summarized results
			fluence (mJ/cm^2)	2 color SNR	σ 2 color SNR	1 color SNR	σ 1 color SNR	2-color signal	σ 2-color signal	1-color-signal	σ 1-color-signal
			42.1	0.273062	0.0140496	0.0883326	0.0137718	1.29011	0.064221	0.619922	0.0197305
			28.1	0.40761	0.0109675	0.120324	0.0107618	1.05316	0.0332549	0.476161	0.0206179
			7	1.52972	0.0316841	0.362559	0.0150017	0.829644	0.0489302	0.250237	0.00846309
			Ion counts
fluence (mJ/cm2)	scheme	file name	Gd-152	σ Gd-152	Gd-154	σ Gd-154	Gd-155	σ Gd-155	Gd-156	σ Gd-156	Gd-157	σ Gd-157	Gd-158	σ Gd-158	Gd-160	σ Gd-160	NdO at 159	σ NdO at 159	NdO-161	σ NdO-161
28.1	2c_new	GdNd001.tagged	28.0001	5.29151	235.003	15.3949	1617.12	40.2134	2060.19	45.4113	1636.13	40.4985	8416.31	92.3055	7657.96	88.7804	3172.36	58.4497	2306.18	49.3577
	2 color reference	GdNd001.untagged	13	3.60555	201.002	14.2479	1524.12	39.0912	1956.19	44.2289	1735.15	41.6552	14463.5	120.572	13316.8	116.055	8115.63	90.7173	6124.68	78.7952
			2.15385	0.722863	1.16916	0.112847	1.06102	0.0379041	1.05316	0.0332549	0.942929	0.0325141	0.581898	0.00801623	0.57506	0.00834042	0.390895	0.00842393	0.376539	0.00940273
		file name	Gd-152	σ Gd-152	Gd-154	σ Gd-154	Gd-155	σ Gd-155	Gd-156	σ Gd-156	Gd-157	σ Gd-157	Gd-158	σ Gd-158	Gd-160	σ Gd-160	NdO-159	σ NdO-159	NdO-161	σ NdO-161
	2c_new	GdNd003.tagged	2	1.41421	51.0002	7.14144	383.009	19.5706	526.014	22.935	365.007	19.1051	1029.04	32.6044	958.04	32.0006	203.002	15.4597	152.001	12.9615
	2 color reference	GdNd003.untagged	3	1.73205	69.0004	8.30665	469.013	21.7028	634.023	25.1798	538.017	23.1952	6482.71	80.6518	5878.29	76.9694	3587.97	60.133	2694.55	52.1397
7			0.666667	0.60858	0.739128	0.13649	0.816628	0.0562948	0.829644	0.0489302	0.67843	0.0460051	0.158737	0.00540326	0.162979	0.0058472	0.0565784	0.00441186	0.0564104	0.00493256
		file name	Gd-152	σ Gd-152	Gd-154	σ Gd-154	Gd-155	σ Gd-155	Gd-156	σ Gd-156	Gd-157	σ Gd-157	Gd-158	σ Gd-158	Gd-160	σ Gd-160	NdO-159	σ NdO-159	NdO-161	σ NdO-161
	2c_new	GdNd004.tagged	9.00001	3	114.001	10.6771	684.024	26.1538	925.043	30.4474	732.028	27.056	5101.84	71.6787	4557.68	68.1005	2352.2	50.1219	1628.1	40.989
	2 color reference	GdNd004.untagged	5.00001	2.23607	66.0003	8.12406	574.018	23.9587	717.029	26.7774	632.022	25.1798	5849.07	76.8445	5203.67	72.9361	3288.73	57.9373	2514.43	50.6599
42.1			1.8	1.00399	1.72728	0.267161	1.19164	0.067452	1.29011	0.064221	1.15823	0.0629432	0.872247	0.0167779	0.875858	0.0179437	0.715232	0.0197747	0.647502	0.0208789
		file name	Gd-152	σ Gd-152	Gd-154	σ Gd-154	Gd-155	σ Gd-155	Gd-156	σ Gd-156	Gd-157	σ Gd-157	Gd-158	σ Gd-158	Gd-160	σ Gd-160	NdO-159	σ NdO-159	NdO-161	σ NdO-161
28.1	1 color	GdNd006.tagged	7.00001	2.64575	89.0004	9.434	584.016	24.1664	790.026	28.1785	623.017	24.9603	8701.84	93.6474	7728.27	88.6356	3958.62	64.0517	2807.31	53.9937
	2 color reference	GdNd006.untagged	11	3.60555	187.003	13.7478	1234.08	35.1295	1659.16	40.7327	1409.11	37.5648	15642.2	125.54	14572.3	121.459	9010.59	95.7214	6888.3	83.596
			0.636364	0.318369	0.475932	0.0613945	0.473238	0.0237686	0.476161	0.0206179	0.442134	0.0212765	0.556306	0.00746836	0.530338	0.00751901	0.43933	0.00850368	0.407548	0.00926846
		file name	Gd-152	σ Gd-152	Gd-154	σ Gd-154	Gd-155	σ Gd-155	Gd-156	σ Gd-156	Gd-157	σ Gd-157	Gd-158	σ Gd-158	Gd-160	σ Gd-160	NdO-159	σ NdO-159	NdO-161	σ NdO-161
7	1 color	GdNd009.tagged	9.00002	3.87299	112.001	10.583	821.028	28.7233	1103.05	33.3923	836.028	28.9832	4986.97	74.813	4405.78	72.4278	1880.14	49.9014	1603.09	45.2006
	2 color reference	GdNd009.untagged	20	4.69042	447.012	21.1899	3214.59	56.7679	4408.02	66.4682	3819.79	61.9014	39722.6	200.556	36735.5	193.684	23126.6	153.918	17745.8	134.781
			0.45	0.220539	0.250554	0.0264872	0.255407	0.0100091	0.250237	0.00846309	0.218868	0.00837572	0.125545	0.00198719	0.119932	0.00207052	0.0812978	0.00222455	0.0903363	0.00263791
		file name	Gd-152	σ Gd-152	Gd-154	σ Gd-154	Gd-155	σ Gd-155	Gd-156	σ Gd-156	Gd-157	σ Gd-157	Gd-158	σ Gd-158	Gd-160	σ Gd-160	NdO-159	σ NdO-159	NdO-161	σ NdO-161
42.1	1 color	GdNd010.tagged	16	4.47214	182.001	13.4908	1166.06	34.1476	1602.11	40.0762	1193.06	34.6563	21603.3	147.558	19361	140.417	11107.8	106.938	8173.57	91.5072
	2 color reference	GdNd010.untagged	17	4.12311	310.006	17.607	1894.2	43.5224	2584.37	50.8563	2128.25	46.2196	24624	157.728	22901	152.444	13929.4	119.17	10927.3	105.344
			0.941176	0.348296	0.58709	0.0548237	0.615593	0.022914	0.619922	0.0197305	0.560582	0.0203317	0.877327	0.00821523	0.845421	0.00832259	0.797437	0.0102705	0.747993	0.011051
								Previously measured isotope fractions
					Gd-152	σ Gd-152	Gd-154	σ Gd-154	Gd-155	σ Gd-155	Gd-156	σ Gd-156	Gd-157	σ Gd-157	Gd-158	σ Gd-158	Gd-160	σ Gd-160	Gd-152 to 158 sum
			2-color ref		0.0014551	0.000158431	0.0258112	0.000704184	0.15352	0.00219982	0.193666	0.00261844	0.172522	0.00239943	0.233147	0.00302442	0.219878	0.002888	0.780122
			1- color		0.00335198	0.000260333	0.0231482	0.000721567	0.147778	0.00233217	0.203041	0.00296001	0.158182	0.00245173	0.244258	0.00342001	0.220241	0.00315261	0.779759
			2-color new		0.00168549	0.000399184	0.0228483	0.00155539	0.14919	0.00508903	0.205305	0.00646632	0.161088	0.00538431	0.242871	0.00737727	0.217013	0.00674978	0.782987
			natural		0.002	0.0003	0.0218	0.0002	0.148	0.0009	0.2047	0.0003	0.1565	0.0004	0.2484	0.0008	0.2186	0.0003	0.7814
								Expected fractions: only Gd 152-158
			2-color ref		0.00186523	0.000203084	0.0330861	0.000902659	0.196789	0.00281984	0.248252	0.00335645	0.221148	0.00307571	0.29886	0.00387686			1
			1- color		0.00429873	0.000333864	0.0296863	0.000925372	0.189517	0.00299089	0.260389	0.00379606	0.20286	0.00314422	0.313248	0.00438599			1
			2-color new		0.00215264	0.000509822	0.029181	0.00198648	0.19054	0.0064995	0.262207	0.00825853	0.205735	0.00687662	0.310185	0.00942195			1
			natural		0.00255951	0.000383926	0.0278986	0.000255951	0.189404	0.00115178	0.261966	0.000383926	0.200282	0.000511902	0.317891	0.0010238
								Ratio of Gadolinium to oxide calculation
			2 color scheme (new)		Gd-152	σ Gd-152	Gd-154	σ Gd-154	Gd-155	σ Gd-155	Gd-156	σ Gd-156	Gd-157	σ Gd-157	Gd-158	σ Gd-158	Gd-160	σ Gd-160	Gd-152 to 158 sum
			28.1	mJ/cm^2	9.00001	3	114.001	10.6771	684.024	26.1538	925.043	30.4474	732.028	27.056	5101.84	71.6787	4557.68	68.1005	7565.93
			expected counts		7.59433		102.948		672.208		925.043		725.817		1094.31	Gd 158/NdO ratio	σ Gd 158/NdO ratio
			difference		1.40568		11.053		11.8157		0		6.21098		4007.53	0.273062	0.0140496
			expected total		3527.92	0.0335529
			7		2	1.41421	51.0002	7.14144	383.009	19.5706	526.014	22.935	365.007	19.1051	1029.04	32.6044	958.04	32.0006	2356.07
			expected counts		4.31842		58.54		382.242		526.014		412.726		622.263	Gd 158/NdO ratio	σ Gd 158/NdO ratio
			difference		-2.31841		-7.53988		0.76635		0		-47.7197		406.781	1.52972	0.0316841
			expected total		2006.1	0.0335529
			42.1		28.0001	5.29151	235.003	15.3949	1617.12	40.2134	2060.19	45.4113	1636.13	40.4985	8416.31	92.3055	7657.96	88.7804	13992.7
			expected counts		16.9135		229.278		1497.09		2060.19		1616.49		2437.16	Gd 158/NdO ratio	σ Gd 158/NdO ratio
			difference		11.0865		5.72486		120.027		0		19.6396		5979.15	0.40761	0.0109675
			expected total		7857.12	0.0335529
			1 color scheme
			7	mJ/cm^2	9.00002	3.87299	112.001	10.583	821.028	28.7233	1103.05	33.3923	836.028	28.9832	4986.97	74.813	4405.78	72.4278	7868.08
			expected counts		18.2101		125.756		802.824		1103.05		859.347		1326.97	Gd 158/NdO ratio	σ Gd 158/NdO ratio
			difference		-9.21008		-13.7553		18.2047		0		-23.3193		3660.01	0.362559	0.0150017
			expected total		4236.15	0.0155764
			28.1	mJ/cm^2	7.00001	2.64575	89.0004	9.434	584.016	24.1664	790.026	28.1785	623.017	24.9603	8701.84	93.6474	7728.27	88.6356	10794.9
			expected counts		6.48587		87.9219		574.094		790.026		619.878		934.584	Gd 158/NdO ratio	σ Gd 158/NdO ratio
			difference		0.514136		1.07849		9.92187		0		3.13888		7767.26	0.120324	0.0107618
			expected total		3012.99	0.0155764
			42.1	mJ/cm^2	5.00001	2.23607	31.0001	5.56777	278.003	16.6734	365.006	19.1051	262.003	16.3096	5320.06	73.2671	4771.86	69.8131	6261.07
			expected counts		2.99659		40.6214		265.241		365.006		286.394		431.794	Gd 158/NdO ratio	σ Gd 158/NdO ratio
			difference		2.00342		-9.62137		12.762		0		-24.3913		4888.27	0.0883326	0.0137718
			expected total		1392.05	0.0155764
